# Supplementary material for: Quantitative Imaging features Improve Discrimination of Malignancy in Pulmonary nodules
Source: Springer Nature journal article supplement (doi:10.1038/s41598-019-44562-z), 2019-06-12
Supplement: 41598_2019_44562_MOESM1_ESM.pdf [file 41598_2019_44562_MOESM1_ESM.pdf]

**SUPPLEMENTAL SECTION**  
***FOR***

**Quantitative Imaging features Improve Discrimination of  
Malignancy in Pulmonary nodules**

Yoganand Balagurunathan<sup>1</sup>, Matthew B. Schabath<sup>2</sup>, Hua Wang<sup>1,3</sup>, Ying Liu<sup>1,3</sup>, Robert J. Gillies<sup>1</sup>.

<sup>1</sup>Department of Cancer Imaging and Metabolism and <sup>2</sup>Department of Cancer Epidemiology, H. Lee Moffitt Cancer Center and Research Institute, Tampa, FL.

<sup>3</sup>Department of Radiology, Tianjin Medical University and Cancer Hospital, China.

**Corresponding Author**

Dr. Yoga Balagurunathan,  
Cancer Imaging and Metabolism,  
Moffitt Cancer Center,  
12901 USF Magnolia Avenue, SRB-4 Imaging,  
Tampa, FL 33612.  
Email: {[yogab](mailto:yogab@moffitt.org), [Robert.gillies](mailto:Robert.gillies@moffitt.org)}@moffitt.org

**Keywords:** Radiomics on Lung Nodules, IPN, quantitative imaging, CAD methods in pulmonary nodules

**Key: Abbreviations used in the study:**

**A. Classifier Results Section:**

Error: Classifier error (1- Accuracy)

Sensitivity(or Recall): True Positive Rate (TPR) =>(True Positive/True Positive + False Negative)

Specificity: True Negative Rate (TNR) => (True Negative/True Negative + False Positive)

PPV (or Precision): Positive predictive value: => (True Positive/True Positive + False positive)

NPV: Negative Predictive value => (True negative/True negative + False negative)

AUC: Area under the Receiver Operator Curve

CI: 95% Confidence Limits (on AUC).

**B. Nodule Size**

**Mixed/All: All size range**

**Range 1 (R1):** Nodule size:  $\geq 4$  to  $\leq 12$ mm (indeterminate range)

**Range 2 (R2):** Nodule size:  $>12$  to  $\leq 30$ mm (intermediate range)

**C. Feature Categories**

**Mixed/All:** Mixed categories (129 re-producible & non redundant features)

**C1:** Size & Shape Features (17 features)

**C2:** Location, Co-occurrence, Runlength, Histogram (26 Features)

**C3:** Texture: Wavelets & Laws (86 features)

**Stable in Controls:** Features stable in Nodule positive (Nodule +) controls (26 features)

**Definiens Suite (1):** Commercial imaging suite used to read and segment CT thorax images. We extract quantitative features using custom routines.

**Table S1.** Details on CT scanner parameters for case-control cohorts used in the study.

a) Patient distribution for train and test cohort

| <b>a. Patient Sample Distribution ( Scanner Parameters )</b>    |        |        |       |                |        |       |
|-----------------------------------------------------------------|--------|--------|-------|----------------|--------|-------|
| <b>Training</b>                                                 |        |        |       | <b>Testing</b> |        |       |
|                                                                 | Cancer | Normal | Total | Cancer         | Normal | Total |
| <b>Samples</b>                                                  | 78     | 166    | 244   | 88             | 147    | 235   |
| <b>NLST Trial: Collection Center</b>                            |        |        |       |                |        |       |
| <b>LSS</b><br>(Lung screening Study)                            | 48     | 126    | 174   | 59             | 105    | 164   |
| <b>ACRIN</b><br>(American College of Radiology Imaging Network) | 30     | 40     | 70    | 29             | 42     | 71    |
| <b>Scanner Types</b>                                            |        |        |       |                |        |       |
| GE                                                              | 41     | 86     | 127   | 50             | 70     | 120   |
| Siemens                                                         | 31     | 59     | 90    | 31             | 52     | 83    |
| Toshiba                                                         | 3      | 7      | 10    | 5              | 7      | 12    |
| Philips                                                         | 3      | 14     | 17    | 2              | 18     | 20    |
| <b>Slice Thickness (mm)</b>                                     |        |        |       |                |        |       |
| 1                                                               | 1      | 1      | 2     | 0              | 0      | 0     |
| 1.25                                                            | 6      | 5      | 11    | 5              | 6      | 11    |
| 2                                                               | 31     | 64     | 95    | 36             | 56     | 92    |
| 2.5                                                             | 35     | 80     | 115   | 45             | 72     | 117   |
| 3                                                               | 2      | 2      | 4     | 0              | 2      | 2     |
| 3.2                                                             | 3      | 14     | 17    | 2              | 13     | 15    |
| <b>Reconstruction Kernel</b>                                    |        |        |       |                |        |       |
| Bone (GE)                                                       | 1      | 7      | 8     | 0              | 8      | 8     |
| Standard (GE)                                                   | 40     | 48     | 88    | 50             | 69     | 119   |
| Lung (GE)                                                       | 0      | 1      | 1     | 0              | 1      | 1     |
| B30f (Siemens)                                                  | 31     | 58     | 89    | 30             | 55     | 85    |
| B50f (Siemens)                                                  | 0      | 1      | 1     | 1              | 1      | 2     |
| FC01(Toshiba)                                                   | 0      | 1      | 1     | 1              | 1      | 2     |
| FC02(Toshiba)                                                   | 0      | 1      | 1     | 0              | 0      | 0     |
| FC10(Toshiba)                                                   | 0      | 2      | 2     | 3              | 2      | 5     |
| FC30(Toshiba)                                                   | 2      | 1      | 3     | 0              | 1      | 1     |
| FC51(Toshiba)                                                   | 1      | 2      | 3     | 1              | 3      | 4     |
| A (Philips)                                                     | 1      | 0      | 1     | 0              | 1      | 1     |
| C (Philips)                                                     | 0      | 13     | 13    | 2              | 12     | 14    |
| D (Philips)                                                     | 2      | 1      | 3     | 0              | 0      | 0     |

b) Patient distribution based on case and control.

| <b>a. Case Control (Scanner &amp; Reconstruction kernels)</b> |              |             |              |                              |             |              |
|---------------------------------------------------------------|--------------|-------------|--------------|------------------------------|-------------|--------------|
| <b>Cancer Cases</b>                                           |              |             |              | <b>Normal Cases</b>          |             |              |
|                                                               | <b>Train</b> | <b>Test</b> | <b>Total</b> | <b>Train</b>                 | <b>Test</b> | <b>Total</b> |
| <b>Samples</b>                                                | 78           | 88          | 165          | 166                          | 147         | 313          |
| <b>Collection Center</b>                                      |              |             |              |                              |             |              |
| LSS (Lung screening Study)                                    | 48           | 126         | 174          | 59                           | 105         | 164          |
| ACRIN(American College of Radiology Imaging Network)          | 30           | 40          | 70           | 29                           | 42          | 71           |
| <b>Scanner</b>                                                |              |             |              | <b>Scanner</b>               |             |              |
| GE                                                            | 41           | 50          | 91           | 86                           | 70          | 156          |
| Siemens                                                       | 31           | 31          | 61           | 59                           | 52          | 111          |
| Toshiba                                                       | 3            | 5           | 8            | 7                            | 7           | 14           |
| Philips                                                       | 3            | 2           | 5            | 14                           | 18          | 32           |
| <b>Slice Thickness (mm)</b>                                   |              |             |              | <b>Slice Thickness (mm)</b>  |             |              |
| 1                                                             | 1            | 0           | 1            | 1                            | 0           | 1            |
| 1.25                                                          | 6            | 5           | 11           | 5                            | 6           | 11           |
| 2                                                             | 31           | 36          | 66           | 64                           | 56          | 120          |
| 2.5                                                           | 35           | 45          | 80           | 80                           | 72          | 152          |
| 3                                                             | 2            | 0           | 2            | 2                            | 2           | 4            |
| 3.2                                                           | 3            | 2           | 5            | 14                           | 13          | 27           |
| <b>Reconstruction Kernel</b>                                  |              |             |              | <b>Reconstruction Kernel</b> |             |              |
| Bone (GE)                                                     | 1            | 0           | 1            | 7                            | 8           | 15           |
| Standard (GE)                                                 | 40           | 50          | 90           | 48                           | 69          | 117          |
| Lung (GE)                                                     | 0            | 0           | 0            | 1                            | 1           | 2            |
| B30f (Siemens)                                                | 31           | 30          | 60           | 58                           | 55          | 113          |
| B50f (Siemens)                                                | 0            | 1           | 1            | 1                            | 1           | 2            |
| FC01(Toshiba)                                                 | 0            | 1           | 1            | 1                            | 1           | 2            |
| FC02(Toshiba)                                                 | 0            | 0           | 0            | 1                            | 0           | 1            |
| FC10(Toshiba)                                                 | 0            | 3           | 3            | 2                            | 2           | 4            |
| FC30(Toshiba)                                                 | 2            | 0           | 2            | 1                            | 1           | 2            |
| FC51(Toshiba)                                                 | 1            | 1           | 2            | 2                            | 3           | 5            |
| A                                                             | 1            | 0           | 1            | 0                            | 1           | 1            |
| C                                                             | 0            | 2           | 2            | 13                           | 12          | 25           |
| D                                                             | 2            | 0           | 2            | 1                            | 0           | 1            |



**Supplemental Table S2. Common Segmentation Complications**

| <b>Complication</b>                    | <b>Description</b>                                                                                                                                                                                                                 |
|----------------------------------------|------------------------------------------------------------------------------------------------------------------------------------------------------------------------------------------------------------------------------------|
| <b>Nodule attached to lung wall</b>    | Often the lung field preprocessing will identify any nodules attached to the lung wall as body tissue                                                                                                                              |
| <b>Semisolid Nodules</b>               | When selecting a seed point in tissue composed of varied intensities (GGO + Solid) Definiens software suite (1) will sometimes select the entire area of interest while other times only selecting the solids, leaving out the GGO |
| <b>GGO</b>                             | Ground glass opacity nodules will segment incorrectly depending on the intensity of the surrounding tissue. In some cases the “click and grow” will yield no results. (Error Message: Area too Dark)                               |
| <b>Inflammation / Scar tissue</b>      | When selecting a GGO the “click and grow” will lock onto nearby inflammation with brighter intensity. When selecting a solid nodule the “click and grow” will lock onto nearby scar tissue with brighter intensity.                |
| <b>Contains air</b>                    | If a larger nodule has a dark center the “click and grow” routine will try to segment it out but the result is usually quite incorrect; removing tissue that should be included.                                                   |
| <b>Spiculation</b>                     | Generally the more highly spiculated nodules will present more difficulty, and will have a greater chance of selecting nearby bronchi                                                                                              |
| <b>Between two lobes</b>               | A nodule can sometimes attach itself to a fissure line between two lobes, allowing it to “move” more than nodules normally do when scrolling through a series.                                                                     |
| <b>Bronchial Tree</b>                  | If the bronchial tree is anywhere near the tumor nodule it is almost always included when growing the ROI                                                                                                                          |
| <b>“Independent” nodules too close</b> | Two independent nodules at T0 can intersect later at T2 and be mostly impossible to differentiate.                                                                                                                                 |
| <b>Bone/ Calcification</b>             | If nodule contains a calcification or is near a bone and that tissue is included, the features can be highly skewed by even a pixel or two.                                                                                        |

**Supplemental Table S3.** Feature categories with description.

| Category                                                       |                                        | Description                                               | Number of Descriptors |          |                                                        |
|----------------------------------------------------------------|----------------------------------------|-----------------------------------------------------------|-----------------------|----------|--------------------------------------------------------|
|                                                                | Sub category                           |                                                           | Subtotal              | Subtotal | Test-retest<br>( $CCC \geq 0.7$ &<br>$R^2 \geq 0.95$ ) |
| <b>C1: Tumor Size &amp; Shape</b>                              | a: Tumor Size                          | Size, volume descriptors                                  | 13                    | 25       | 17                                                     |
|                                                                | b: Tumor Shape                         | Roundness/circularity descriptors                         | 12                    |          |                                                        |
| <b>C2: Tumor Location, Co-occurrence, Run L and Histogram.</b> | a: Tumor Location                      | Relative to pleural wall, border flags                    | 14                    | 39       | 26                                                     |
|                                                                | b: Pixel Intensity Histogram           | Statistics on the Intensity or Attenuation values (in HU) | 8                     |          |                                                        |
|                                                                | c: Grayscale: Runlength & CoOccurrence | Run length and Co-occurrence patterns                     | 17                    |          |                                                        |
| <b>C3: Texture: Laws &amp; Wavelets</b>                        | a: Texture: Laws features              | Laws Kernel (energy)                                      | 125                   | 155      | 86                                                     |
|                                                                | b: Texture: Wavelets                   | Wavelet kernels (entropy and energy)                      | 30                    |          |                                                        |
| <b>Total</b>                                                   |                                        |                                                           | <b>219</b>            |          | <b>129</b>                                             |

**Supplemental S.4** Quantitative Image features used to describe the lung tumors\*.

| Index | Feature Index | Description of the Features   | Feature Category                                                        |
|-------|---------------|-------------------------------|-------------------------------------------------------------------------|
| 1     | F1            | LongDia                       | C1.Tumor Size & Shape<br>(Size Information)                             |
| 2     | F2            | ShortAx-LongDia               |                                                                         |
| 3     | F3            | ShortAx                       |                                                                         |
| 4     | F6            | Vol-cm                        |                                                                         |
| 5     | F33           | Area-Pxl                      |                                                                         |
| 6     | F34           | Volume-pxl                    |                                                                         |
| 7     | F35           | Num-Pxl                       |                                                                         |
| 8     | F36           | Width-Pxl                     |                                                                         |
| 9     | F37           | Thickness-Pxl                 |                                                                         |
| 10    | F38           | Length-Pxl                    |                                                                         |
| 11    | F39           | Length-by-Thick               |                                                                         |
| 12    | F40           | Length-by-Width               |                                                                         |
| 13    | F41           | Border-Leng-Pxl               |                                                                         |
|       |               |                               |                                                                         |
| 14    | F7            | 5a-3D-MacSpic                 | C1.Tumor Size & Shape<br>(Shape Information)                            |
| 15    | F13           | 9b-3D-Circularity             |                                                                         |
| 16    | F14           | 9c-3D-Compact                 |                                                                         |
| 17    | F23           | Asymmetry                     |                                                                         |
| 18    | F24           | Compactness                   |                                                                         |
| 19    | F25           | Density                       |                                                                         |
| 20    | F26           | EllipticFit                   |                                                                         |
| 21    | F28           | Rad-Largest-Enclosed-Ellipse  |                                                                         |
| 22    | F29           | Rad-Smallest-Enclosed-Ellipse |                                                                         |
| 23    | F30           | Shape-Index                   |                                                                         |
| 24    | F31           | Roundness                     |                                                                         |
| 25    | F32           | RectangularFit                |                                                                         |
|       |               |                               |                                                                         |
| 26    | F8            | 8a-3D-Attch-Pleural           | C2. Location, RunL, CoOcc &<br>Histogram<br>(Location Information)      |
| 27    | F9            | 8b-3D-Bord-to-Lung            |                                                                         |
| 28    | F10           | 8c-3D-Bord-to-Pleural         |                                                                         |
| 29    | F11           | 8d-3D-Rat-Free-to-Attach      |                                                                         |
| 30    | F12           | 9a-3D-FractionalAnisotropy    |                                                                         |
| 31    | F15           | 9d-3D-AV-Dist-COG-to-Border   |                                                                         |
| 32    | F16           | 9e-3D-SD-Dist-COG-to-Border   |                                                                         |
| 33    | F17           | 9f-3D-Min-Dist-COG-to-Border  |                                                                         |
| 34    | F18           | 9g-3D-Max-Dist-COG-to-Border  |                                                                         |
| 35    | F19           | 10a-3D-Relat-Vol-Airspaces    |                                                                         |
| 36    | F20           | 10b-3D-Num-AirSpaces          |                                                                         |
| 37    | F21           | 10c-3D-Av-Vol-AirSpaces       |                                                                         |
| 38    | F22           | 10d-3D-SD-Vol-AirSpaces       |                                                                         |
| 39    | F27           | Main-Direction                |                                                                         |
|       |               |                               |                                                                         |
| 40    | F4            | Mn-Hu                         | C2. Location, RunL, CoOcc &<br>Histogram<br>(Pixel Intensity Histogram) |
| 41    | F5            | Std-Hu                        |                                                                         |
| 42    | F184          | Hist-Mean-L1                  |                                                                         |
| 43    | F185          | Hist-SD-L1                    |                                                                         |



**SUPPLEMENTALS:** *Quantitative Imaging Features Improves Discrimination of Malignancy in Pulmonary Nodules (Y. Balagurunathan et al.)*

|    |      |                               |                                                                                   |
|----|------|-------------------------------|-----------------------------------------------------------------------------------|
| 44 | F186 | Hist-Energy-L1                |                                                                                   |
| 45 | F187 | Hist-Entropy-L1               |                                                                                   |
| 46 | F188 | Hist-Kurt-L1                  |                                                                                   |
| 47 | F189 | Hist-Skew-L1                  |                                                                                   |
|    |      |                               |                                                                                   |
| 48 | F42  | AvgCoOc-Homo                  | C2. Location, RunL, CoOcc & Histogram<br>(Runlength and Cooccurrence)             |
| 49 | F43  | AvgCooc-Mp                    |                                                                                   |
| 50 | F44  | AvgCooC-Constrast             |                                                                                   |
| 51 | F45  | AvgCooC-Energy                |                                                                                   |
| 52 | F46  | AvgCooC-Entropy               |                                                                                   |
| 53 | F47  | AvgCoOc-Mean                  |                                                                                   |
| 54 | F48  | AvgGLN                        |                                                                                   |
| 55 | F49  | AvgHGRE                       |                                                                                   |
| 56 | F50  | AvgLGRE                       |                                                                                   |
| 57 | F51  | AvgLRE                        |                                                                                   |
| 58 | F52  | AvgLRHGE                      |                                                                                   |
| 59 | F53  | AvgLRLGE                      |                                                                                   |
| 60 | F54  | AvgRLN                        |                                                                                   |
| 61 | F55  | AvgRP                         |                                                                                   |
| 62 | F56  | AvgSRE                        |                                                                                   |
| 63 | F57  | AvgSRHGE                      |                                                                                   |
| 64 | F58  | AvgSRLGE                      |                                                                                   |
|    |      |                               |                                                                                   |
| 59 | F59  | 3D-Laws-1( E5 E5 E5 Layer 1)  | C3.Texture:<br>Laws & Wavelet Feature<br><br>(with different convolution filters) |
| 60 | F60  | 3D-Laws-2( E5 E5 L5 Layer 1)  |                                                                                   |
| 61 | F61  | 3D-Laws-3( E5 E5 R5 Layer 1)  |                                                                                   |
| 62 | F62  | 3D-Laws-4( E5 E5 S5 Layer 1)  |                                                                                   |
| 63 | F63  | 3D-Laws-5( E5 E5 W5 Layer 1)  |                                                                                   |
| 64 | F64  | 3D-Laws-6( E5 L5 E5 Layer 1)  |                                                                                   |
| 65 | F65  | 3D-Laws-7( E5 L5 L5 Layer 1)  |                                                                                   |
| 66 | F66  | 3D-Laws-8( E5 L5 R5 Layer 1)  |                                                                                   |
| 67 | F67  | 3D-Laws-9( E5 L5 S5 Layer 1)  |                                                                                   |
| 68 | F68  | 3D-Laws-10( E5 L5 W5 Layer 1) |                                                                                   |
| 69 | F69  | 3D-Laws-11( E5 R5 E5 Layer 1) |                                                                                   |
| 70 | F70  | 3D-Laws-12( E5 R5 L5 Layer 1) |                                                                                   |
| 71 | F71  | 3D-Laws-13( E5 R5 R5 Layer 1) |                                                                                   |
| 72 | F72  | 3D-Laws-14( E5 R5 S5 Layer 1) |                                                                                   |
| 73 | F73  | 3D-Laws-15( E5 R5 W5 Layer 1) |                                                                                   |
| 74 | F74  | 3D-Laws-16( E5 S5 E5 Layer 1) |                                                                                   |
| 75 | F75  | 3D-Laws-17( E5 S5 L5 Layer 1) |                                                                                   |
| 76 | F76  | 3D-Laws-18( E5 S5 R5 Layer 1) |                                                                                   |
| 77 | F77  | 3D-Laws-19( E5 S5 S5 Layer 1) |                                                                                   |
| 78 | F78  | 3D-Laws-20( E5 S5 W5 Layer 1) |                                                                                   |
| 79 | F79  | 3D-Laws-21( E5 W5 E5 Layer 1) |                                                                                   |
| 80 | F80  | 3D-Laws-22( E5 W5 L5 Layer 1) |                                                                                   |
| 81 | F81  | 3D-Laws-23( E5 W5 R5 Layer 1) |                                                                                   |
| 82 | F82  | 3D-Laws-24( E5 W5 S5 Layer 1) |                                                                                   |
| 83 | F83  | 3D-Laws-25( E5 W5 W5 Layer 1) |                                                                                   |
| 84 | F84  | 3D-Laws-26( L5 E5 E5 Layer 1) |                                                                                   |
| 85 | F85  | 3D-Laws-27( L5 E5 L5 Layer 1) |                                                                                   |
| 86 | F86  | 3D-Laws-28( L5 E5 R5 Layer 1) |                                                                                   |
| 87 | F87  | 3D-Laws-29( L5 E5 S5 Layer 1) |                                                                                   |

**SUPPLEMENTALS:** *Quantitative Imaging Features Improves Discrimination of Malignancy in Pulmonary Nodules (Y. Balagurunathan et al.)*

|     |      |                               |
|-----|------|-------------------------------|
| 88  | F88  | 3D-Laws-30( L5 E5 W5 Layer 1) |
| 89  | F89  | 3D-Laws-31( L5 L5 E5 Layer 1) |
| 90  | F90  | 3D-Laws-32( L5 L5 L5 Layer 1) |
| 91  | F91  | 3D-Laws-33( L5 L5 R5 Layer 1) |
| 92  | F92  | 3D-Laws-34( L5 L5 S5 Layer 1) |
| 93  | F93  | 3D-Laws-35( L5 L5 W5 Layer 1) |
| 94  | F94  | 3D-Laws-36( L5 R5 E5 Layer 1) |
| 95  | F95  | 3D-Laws-37( L5 R5 L5 Layer 1) |
| 96  | F96  | 3D-Laws-38( L5 R5 R5 Layer 1) |
| 97  | F97  | 3D-Laws-39( L5 R5 S5 Layer 1) |
| 98  | F98  | 3D-Laws-40( L5 R5 W5 Layer 1) |
| 99  | F99  | 3D-Laws-41( L5 S5 E5 Layer 1) |
| 100 | F100 | 3D-Laws-42( L5 S5 L5 Layer 1) |
| 101 | F101 | 3D-Laws-43( L5 S5 R5 Layer 1) |
| 102 | F102 | 3D-Laws-44( L5 S5 S5 Layer 1) |
| 103 | F103 | 3D-Laws-45( L5 S5 W5 Layer 1) |
| 104 | F104 | 3D-Laws-46( L5 W5 E5 Layer 1) |
| 105 | F105 | 3D-Laws-47( L5 W5 L5 Layer 1) |
| 106 | F106 | 3D-Laws-48( L5 W5 R5 Layer 1) |
| 107 | F107 | 3D-Laws-49( L5 W5 S5 Layer 1) |
| 108 | F108 | 3D-Laws-50( L5 W5 W5 Layer 1) |
| 109 | F109 | 3D-Laws-51( R5 E5 E5 Layer 1) |
| 110 | F110 | 3D-Laws-52( R5 E5 L5 Layer 1) |
| 111 | F111 | 3D-Laws-53( R5 E5 R5 Layer 1) |
| 112 | F112 | 3D-Laws-54( R5 E5 S5 Layer 1) |
| 113 | F113 | 3D-Laws-55( R5 E5 W5 Layer 1) |
| 114 | F114 | 3D-Laws-56( R5 L5 E5 Layer 1) |
| 115 | F115 | 3D-Laws-57( R5 L5 L5 Layer 1) |
| 116 | F116 | 3D-Laws-58( R5 L5 R5 Layer 1) |
| 117 | F117 | 3D-Laws-59( R5 L5 S5 Layer 1) |
| 118 | F118 | 3D-Laws-60( R5 L5 W5 Layer 1) |
| 119 | F119 | 3D-Laws-70( R5 R5 E5 Layer 1) |
| 120 | F120 | 3D-Laws-71( R5 R5 L5 Layer 1) |
| 121 | F121 | 3D-Laws-72( R5 R5 R5 Layer 1) |
| 122 | F122 | 3D-Laws-73( R5 R5 S5 Layer 1) |
| 123 | F123 | 3D-Laws-74( R5 R5 W5 Layer 1) |
| 124 | F124 | 3D-Laws-75( R5 S5 E5 Layer 1) |
| 125 | F125 | 3D-Laws-76( R5 S5 L5 Layer 1) |
| 126 | F126 | 3D-Laws-77( R5 S5 R5 Layer 1) |
| 127 | F127 | 3D-Laws-78( R5 S5 S5 Layer 1) |
| 128 | F128 | 3D-Laws-79( R5 S5 W5 Layer 1) |
| 129 | F129 | 3D-Laws-80( R5 W5 E5 Layer 1) |
| 130 | F130 | 3D-Laws-81( R5 W5 L5 Layer 1) |
| 131 | F131 | 3D-Laws-82( R5 W5 R5 Layer 1) |
| 132 | F132 | 3D-Laws-83( R5 W5 S5 Layer 1) |
| 133 | F133 | 3D-Laws-84( R5 W5 W5 Layer 1) |
| 134 | F134 | 3D-Laws-85( S5 E5 E5 Layer 1) |
| 135 | F135 | 3D-Laws-86( S5 E5 L5 Layer 1) |
| 136 | F136 | 3D-Laws-87( S5 E5 R5 Layer 1) |
| 137 | F137 | 3D-Laws-88( S5 E5 S5 Layer 1) |
| 138 | F138 | 3D-Laws-89( S5 E5 W5 Layer 1) |
| 139 | F139 | 3D-Laws-90( S5 L5 E5 Layer 1) |
| 140 | F140 | 3D-Laws-91( S5 L5 L5 Layer 1) |

**SUPPLEMENTALS:** *Quantitative Imaging Features Improves Discrimination of Malignancy in Pulmonary Nodules (Y. Balagurunathan et al.)*

|     |      |                                |                                                                        |
|-----|------|--------------------------------|------------------------------------------------------------------------|
| 141 | F141 | 3D-Laws-92( S5 L5 R5 Layer 1)  |                                                                        |
| 142 | F142 | 3D-Laws-93( S5 L5 S5 Layer 1)  |                                                                        |
| 143 | F143 | 3D-Laws-94( S5 L5 W5 Layer 1)  |                                                                        |
| 144 | F144 | 3D-Laws-95( S5 R5 E5 Layer 1)  |                                                                        |
| 145 | F145 | 3D-Laws-96( S5 R5 L5 Layer 1)  |                                                                        |
| 146 | F146 | 3D-Laws-97( S5 R5 R5 Layer 1)  |                                                                        |
| 147 | F147 | 3D-Laws-98( S5 R5 S5 Layer 1)  |                                                                        |
| 148 | F148 | 3D-Laws-99( S5 R5 W5 Layer 1)  |                                                                        |
| 149 | F149 | 3D-Laws-100( S5 S5 E5 Layer 1) |                                                                        |
| 150 | F150 | 3D-Laws-101( S5 S5 L5 Layer 1) |                                                                        |
| 151 | F151 | 3D-Laws-102( S5 S5 R5 Layer 1) |                                                                        |
| 152 | F152 | 3D-Laws-103( S5 S5 S5 Layer 1) |                                                                        |
| 153 | F153 | 3D-Laws-104( S5 S5 W5 Layer 1) |                                                                        |
| 154 | F154 | 3D-Laws-105( S5 W5 E5 Layer 1) |                                                                        |
| 155 | F155 | 3D-Laws-106( S5 W5 L5 Layer 1) |                                                                        |
| 156 | F156 | 3D-Laws-107( S5 W5 R5 Layer 1) |                                                                        |
| 157 | F157 | 3D-Laws-108( S5 W5 S5 Layer 1) |                                                                        |
| 158 | F158 | 3D-Laws-109( S5 W5 W5 Layer 1) |                                                                        |
| 159 | F159 | 3D-Laws-110( W5 E5 E5 Layer 1) |                                                                        |
| 160 | F160 | 3D-Laws-111( W5 E5 L5 Layer 1) |                                                                        |
| 161 | F161 | 3D-Laws-112( W5 E5 R5 Layer 1) |                                                                        |
| 162 | F162 | 3D-Laws-113( W5 E5 S5 Layer 1) |                                                                        |
| 163 | F163 | 3D-Laws-114( W5 E5 W5 Layer 1) |                                                                        |
| 164 | F164 | 3D-Laws-115( W5 L5 E5 Layer 1) |                                                                        |
| 165 | F165 | 3D-Laws-116( W5 L5 L5 Layer 1) |                                                                        |
| 166 | F166 | 3D-Laws-117( W5 L5 R5 Layer 1) |                                                                        |
| 167 | F167 | 3D-Laws-118( W5 L5 S5 Layer 1) |                                                                        |
| 168 | F168 | 3D-Laws-119( W5 L5 W5 Layer 1) |                                                                        |
| 169 | F169 | 3D-Laws-120( W5 R5 E5 Layer 1) |                                                                        |
| 170 | F170 | 3D-Laws-121( W5 R5 L5 Layer 1) |                                                                        |
| 171 | F171 | 3D-Laws-122( W5 R5 R5 Layer 1) |                                                                        |
| 172 | F172 | 3D-Laws-123( W5 R5 S5 Layer 1) |                                                                        |
| 173 | F173 | 3D-Laws-124( W5 S5 E5 Layer 1) |                                                                        |
| 174 | F174 | 3D-Laws-125( W5 S5 L5 Layer 1) |                                                                        |
| 175 | F175 | 3D-Laws-126( W5 R5 W5 Layer 1) |                                                                        |
| 176 | F176 | 3D-Laws-127( W5 S5 R5 Layer 1) |                                                                        |
| 177 | F177 | 3D-Laws-128( W5 S5 S5 Layer 1) |                                                                        |
| 178 | F178 | 3D-Laws-129( W5 S5 W5 Layer 1) |                                                                        |
| 179 | F179 | 3D-Laws-130( W5 W5 E5 Layer 1) |                                                                        |
| 180 | F180 | 3D-Laws-131( W5 W5 L5 Layer 1) |                                                                        |
| 181 | F181 | 3D-Laws-132( W5 W5 R5 Layer 1) |                                                                        |
| 182 | F182 | 3D-Laws-133( W5 W5 S5 Layer 1) |                                                                        |
| 183 | F183 | 3D-Laws-134( W5 W5 W5 Layer 1) |                                                                        |
| 190 | F190 | 3D-Wave-1(P2 L2 C9 Layer 1)    | C3.Texture:<br>Laws & Wavelet Feature<br><br>(with different Wavelets) |
| 191 | F191 | 3D-Wave-2(P1 L2 C9 Layer 1)    |                                                                        |
| 192 | F192 | 3D-Wave-3(P2 L2 C10 Layer 1)   |                                                                        |
| 193 | F193 | 3D-Wave-4(P2 L2 C11 Layer 1)   |                                                                        |
| 194 | F194 | 3D-Wave-5(P2 L2 C12 Layer 1)   |                                                                        |
| 195 | F195 | 3D-Wave-6(P2 L2 C13 Layer 1)   |                                                                        |
| 196 | F196 | 3D-Wave-7(P2 L2 C14 Layer 1)   |                                                                        |
| 197 | F197 | 3D-Wave-8(P2 L2 C15 Layer 1)   |                                                                        |
| 198 | F198 | 3D-Wave-9(P2 L2 C1 Layer 1)    |                                                                        |

**SUPPLEMENTALS:** *Quantitative Imaging Features Improves Discrimination of Malignancy in Pulmonary Nodules (Y. Balagurunathan et al.)*

|                             |      |                               |  |
|-----------------------------|------|-------------------------------|--|
| 199                         | F199 | 3D-Wave-10(P2 L2 C2 Layer 1)  |  |
| 200                         | F200 | 3D-Wave-11(P2 L2 C3 Layer 1)  |  |
| 201                         | F201 | 3D-Wave-12(P2 L2 C4 Layer 1)  |  |
| 202                         | F202 | 3D-Wave-13(P2 L2 C5 Layer 1)  |  |
| 203                         | F203 | 3D-Wave-14(P2 L2 C6 Layer 1)  |  |
| 204                         | F204 | 3D-Wave-15(P2 L2 C7 Layer 1)  |  |
| 205                         | F205 | 3D-Wave-16(P2 L2 C8 Layer 1)  |  |
| 206                         | F206 | 3D-Wave-17(P1 L2 C11 Layer 1) |  |
| 207                         | F207 | 3D-Wave-18(P1 L2 C10 Layer 1) |  |
| 208                         | F208 | 3D-Wave-19(P1 L2 C12 Layer 1) |  |
| 209                         | F209 | 3D-Wave-20(P1 L2 C13 Layer 1) |  |
| 210                         | F210 | 3D-Wave-21(P1 L2 C14 Layer 1) |  |
| 211                         | F211 | 3D-Wave-22(P1 L2 C15 Layer 1) |  |
| 212                         | F212 | 3D-Wave-23(P1 L2 C1 Layer 1)  |  |
| 213                         | F213 | 3D-Wave-24(P1 L2 C2 Layer 1)  |  |
| 214                         | F214 | 3D-Wave-25(P1 L2 C3 Layer 1)  |  |
| 215                         | F215 | 3D-Wave-26(P1 L2 C4 Layer 1)  |  |
| 216                         | F216 | 3D-Wave-27(P1 L2 C5 Layer 1)  |  |
| 217                         | F217 | 3D-Wave-28(P1 L2 C6 Layer 1)  |  |
| 218                         | F218 | 3D-Wave-29(P1 L2 C7 Layer 1)  |  |
| 219                         | F219 | 3D-Wave-30(P1 L2 C8 Layer 1)  |  |
| <i>*See description (2)</i> |      |                               |  |

#### **Supplemental S.4** (*continued*). Description of Texture Features

A. **Run-length analysis:** Run-length texture features (3) examine runs of similar gray values in an image. Runs may be labeled according to their length, gray value, and direction (either horizontal or vertical). Long runs of the same gray value correspond to coarser textures, whereas shorter runs correspond to finer textures. In our study, texture information was quantified by computing 11 features (4) derived from the run-length distribution matrix. They are: 1: Short Run Emphasis (SRE). 2: Long Run Emphasis (LRE). 3: Gray-Level Non-uniformity (GLN). 4: Run Length Non-uniformity (RLN). 5: Run Percentage (RP). 6: Low Gray-Level Run Emphasis (LGRE). 7: High Gray-Level Run Emphasis (HGRE). 8: Short Run Low Gray-Level Emphasis (SRLGE). 9: Short Run High Gray-Level Emphasis (SRHGE). 10: Long Run Low Gray-Level Emphasis (LRLGE). 11: Long Run High Gray-Level Emphasis (LGHGE).

The Co-occurrence matrices and run-length analysis features can be obtained in 3D (5), the features are calculated in 13 different directions, in each direction, processing is done by plane instead of slice. Hence, information between slices is used.

B. **Co-occurrence matrices:** the co-occurrence matrix (6) is a matrix that contains the frequency of one gray level intensity appearing in a specified spatial linear relationship with another gray level intensity within a certain range. Computation of features requires first constructing the co-occurrence matrix, then different

measurements (7) can be calculated based on the matrix. The measurements include: contrast, energy, homogeneity, entropy, mean and max probability.

**C. Laws features :** Laws features (8) were constructed from a set of five one-dimensional filters, each designed to reflect a different type of structure in the image. These one-dimensional filters are defined as E5 (edges), S5 (spots), R5 (ripples), W5 (waves), and L5 (low pass, or average gray value). By using these 1-D convolution filters, 2-D filters are generated by convolving pairs of these filters, such as L5L5, E5L5, S5L5, W5L5, R5L5, etc. We can generate 25 different 2-D filters. 3D laws filters were constructed similarly to 2D. 3D filters are generated by convolving 3 types of 1D filter, such as L5L5L5, L5L5E5, L5L5S5, L5L5R5, L5L5W5, etc. The total number of 3-D filters is 125. For the 3D case, after the convolution with the 3D filters for the image, the energy (9) of the texture feature was computed by the following equation:

$$Energy = \frac{1}{R} \sum_{i=N+1}^{I-N} \sum_{j=N+1}^{J-N} \sum_{k=N+1}^{K-N} h^2(i, j, k)$$

where R is a normalizing factor, I and J, K are image dimensions,  $h(i,j,k)$  is derived from the convolution filters and original image. For the 2D case, the above equation is very similar, but without the 3rd (z direction) dimension.

**D. Wavelet Decomposition:** the discrete wavelet transform (10) can iteratively decompose an image (2D) into four components. Each iteration splits the image both horizontally and vertically into low-frequency (low pass) and high-frequency (high pass) components. Thus, four components are generated: a high-pass/high-pass

component consisting of mostly diagonal structure, a high-pass/low-pass component consisting mostly of vertical structures, a low-pass/high-pass component consisting mostly of horizontal structure, and a low-pass/low-pass component that represents a blurred version of the original image. Subsequent iterations then repeat the decomposition on the low-pass/low-pass component from the previous iteration. These subsequent iterations highlight broader diagonal, vertical, and horizontal textures. And for each component, we calculated the energy (referred to with a suffix P1) & entropy (referred to with a suffix P2) feature. A wavelet transform of a 3D signal can be achieved by applying the 1D wavelet transform along all the three directions (x,y,z). Features obtained at each level of decomposition are referred with suffix L (example: L1, L2) and level of decomposition is referred to with a prefix C (example: C1 to C9).

**E. Pixel Histogram Features:** the pixel intensity histogram  $h(a)$  is the number of pixels that occurred for brightness level “a” with brightness level on the x-axis. The probability distribution of the brightness  $P(a)$  can be calculated as well. Six features: mean, standard deviation, skewness, kurtosis, energy, and entropy were then incorporated.

**Supplemental Table S5.** CT scanner details for reconstruction kernel variation study.

| <b>Sample size to study Scanner Variations on predictions</b> |              |              |               |               |
|---------------------------------------------------------------|--------------|--------------|---------------|---------------|
| <b>Scanner Type &amp; Slice</b>                               | <b>Types</b> | <b>Total</b> | <b>Cancer</b> | <b>Normal</b> |
| Siemens 30F , 2mm                                             | Paired       | 95           | 43            | 52            |
| Siemens 50F, 2mm                                              |              |              |               |               |
| GE Bone, 2.5 mm                                               | Paired       | 53           | 28            | 25            |
| GE Standard, 2.5 mm                                           |              |              |               |               |
| <b>All Samples</b><br>(Siemens & GE)                          |              | 148          | 71            | 77            |



**Supplemental Table S6.** Feature distribution for a range of difference in the Area under the Receiver operative characteristics (AUC) with different reconstruction kernels a) Number features for range of AUC difference, b) features at different AUC difference. Details of the analysis will be reported in our following study (11).

| a. Number of Features (% in category)                          |                                                         |                                                     |                                                     |                                                          |                                 |
|----------------------------------------------------------------|---------------------------------------------------------|-----------------------------------------------------|-----------------------------------------------------|----------------------------------------------------------|---------------------------------|
| Features                                                       | Difference in test AUC: Cancer Vs Normal Discrimination |                                                     |                                                     |                                                          |                                 |
|                                                                | Difference Range (%)                                    | Train:Siemens, B30F, 2mm<br>Test: Siemens, 50F, 2mm | Train: GE, Standard, 2.5mm<br>Test: GE, Bone, 2.5mm | Train: Siemens B30F & 50F 2mm, GE Bone & Standard, 2.5mm |                                 |
|                                                                |                                                         |                                                     |                                                     | Test: Siemens B30F & 50F, 2mm                            | Test: GE Bone & Standard, 2.5mm |
| <b>Size &amp; Shape</b><br>(17 features)                       | ≥ 0, ≤ 5%                                               | 11 (64.71)                                          | 8 (47.06)                                           | 16 (94.12)                                               | 12 (70.59)                      |
|                                                                | > 5, ≤ 10%                                              | 2 (11.76)                                           | 6 (35.29)                                           | 0 (0)                                                    | 3 (17.65)                       |
|                                                                | >10, ≤15%                                               | 0 (0)                                               | 3 (17.65)                                           | 1 (5.88)                                                 | 0 (0)                           |
|                                                                | >15, ≤20%                                               | 2 (11.76)                                           | 0 (0)                                               | 0 (0)                                                    | 1 (5.88)                        |
|                                                                | >20, ≤30%                                               | 0 (0)                                               | 0 (0)                                               | 0 (0)                                                    | 0 (0)                           |
|                                                                | >30, ≤50%                                               | 2 (11.76)                                           | 0 (0)                                               | 0 (0)                                                    | 1 (5.88)                        |
|                                                                | >50%                                                    | 0 (0)                                               | 0 (0)                                               | 0 (0)                                                    | 0 (0)                           |
| <b>Location, RunL, Co-occ &amp; Histogram</b><br>(26 features) | ≥ 0, ≤ 5%                                               | 12 (46.15)                                          | 11 (42.31)                                          | 16 (61.54)                                               | 8 (30.77)                       |
|                                                                | > 5, ≤ 10%                                              | 3 (11.54)                                           | 10 (38.46)                                          | 3 (11.54)                                                | 9 (34.62)                       |
|                                                                | >10, ≤15%                                               | 3 (11.54)                                           | 5 (19.23)                                           | 7 (26.92)                                                | 5 (19.23)                       |
|                                                                | >15, ≤20%                                               | 2 (7.69)                                            | 0 (0)                                               | 0 (0)                                                    | 2 (7.69)                        |
|                                                                | >20, ≤30%                                               | 1 (3.85)                                            | 0 (0)                                               | 0 (0)                                                    | 1 (3.85)                        |
|                                                                | >30, ≤50%                                               | 2 (7.69)                                            | 0 (0)                                               | 0 (0)                                                    | 1 (3.85)                        |
|                                                                | >50%                                                    | 3 (11.54)                                           | 0 (0)                                               | 0 (0)                                                    | 0 (0)                           |
| <b>Texture: Laws &amp; Wavelets</b><br>(86 features)           | ≥ 0, ≤ 5%                                               | 84 (97.67)                                          | 83 (96.51)                                          | 84 (97.67)                                               | 81 (94.19)                      |
|                                                                | > 5, ≤ 10%                                              | 0 (0)                                               | 2 (2.33)                                            | 1 (1.16)                                                 | 3 (3.49)                        |
|                                                                | >10, ≤15%                                               | 0 (0)                                               | 1 (1.16)                                            | 1 (1.16)                                                 | 1 (1.16)                        |
|                                                                | >15, ≤20%                                               | 0 (0)                                               | 0 (0)                                               | 0 (0)                                                    | 0 (0)                           |
|                                                                | >20, ≤30%                                               | 0 (0)                                               | 0 (0)                                               | 0 (0)                                                    | 1 (1.16)                        |
|                                                                | >30, ≤50%                                               | 0 (0)                                               | 0 (0)                                               | 0 (0)                                                    | 0 (0)                           |
|                                                                | >50%                                                    | 2 (2.33)                                            | 0 (0)                                               | 0 (0)                                                    | 0 (0)                           |

**Supplemental Table 6b.** Feature with different AUC variability

| Features with Minimal Variability between Scanner Reconstructions |                          |                                                                                                                                                                                                                                                                                |                                                                                                                                                                                                                                  |
|-------------------------------------------------------------------|--------------------------|--------------------------------------------------------------------------------------------------------------------------------------------------------------------------------------------------------------------------------------------------------------------------------|----------------------------------------------------------------------------------------------------------------------------------------------------------------------------------------------------------------------------------|
| Category                                                          | AUC Difference Range (%) | Matched Pair (difference in convolutional kernel)                                                                                                                                                                                                                              |                                                                                                                                                                                                                                  |
|                                                                   |                          | Siemens 30F Vs 50F (2 mm)                                                                                                                                                                                                                                                      | GE Standard Vs Bone (2.5mm)                                                                                                                                                                                                      |
| <b>Size &amp; Shape</b><br>(17 features)                          | [0 to ≤5]                | F30:Shape-Index, F26:EllipticFit, F1:LongDia, F38:Length-Pxl, F6:Vol-cm, F36:Width-Pxl, F34:Volume-pxl, F37:Thickness-Pxl, F2:ShortAx-LongDia, F41:Border-Leng-Pxl, F14:9c-3D-Compact,F25:Density.                                                                             | F36:Width-Pxl,F30:Shape-Index, F34:Volume-pxl,F41:Border-Leng-Pxl, F14:9c-3D-Compact,F25:Density, F38:Length-Pxl,F6:Vol-cm                                                                                                       |
|                                                                   | [>5 to ≤10]              | F3:ShortAx,F40:Length-by-Width,F32:RectangularFit, F39:Length-by-Thick, F23:Asymmetry.                                                                                                                                                                                         | F37:Thickness-Pxl,F26:EllipticFit, F3:ShortAx,F1:LongDia,F2:ShortAx-LongDia,F32:RectangularFit                                                                                                                                   |
| <b>Location, RunL, Co-occ &amp; Histogram</b><br>(26 features)    | [0 to ≤5]                | F9:8b-3D-Bord-to-Lung, F51:AvgLRE, F186:Hist-Energy-L1, F187:Hist-Entropy-L1, F21:10c-3D-Av-Vol-AirSpaces, F16:9e-3D-SD-Dist-COG-to-Border, F55:AvgRP, F48:AvgGLN, F19:10a-3D-Relat-Vol-Airspaces, F52:AvgLRHGE, F4:Mn-Hu, F17:9f-3D-Min-Dist-COG-to-Border, F189:Hist-Skew-L1 | F44:AvgCooC-Constrast, F51:AvgLRE, F186:Hist-Energy-L1, F17:9f-3D-Min-Dist-COG-to-Border, F4:Mn-Hu, F20:10b-3D-Num-AirSpaces, F188:Hist-Kurt-L1, F187:Hist-Entropy-L1, F55:AvgRP, F22:10d-3D-SD-Vol-AirSpaces, F189:Hist-Skew-L1 |
|                                                                   | [>5 to ≤10]              | F45:AvgCooC-Energy, F43:AvgCooc-Mp, F42:AvgCoOc-Homo, F5:Std-Hu, F188:Hist-Kurt-L1, F185:Hist-SD-L1, F8:8a-3D-Attch-Pleural                                                                                                                                                    | F48:AvgGLN, F19:10a-3D-Relat-Vol-Airspaces, F42:AvgCoOc-Homo, F27:Main-Direction, F5:Std-Hu, F43:AvgCooc-Mp, F8:8a-3D-Attch-Pleural, F9:8b-3D-Bord-to-Lung, F16:9e-3D-SD-Dist-COG-to-Border, F45:AvgCooC-Energy.                 |
| <b>Texture: Wavelets</b><br>(86 features)                         | [0 to ≤5]                | F216:3D-WaveP1-L2-27, F215:3D-WaveP1-L2-26, F214:3D-WaveP1-L2-25<br><i>(refer to Supplemental Table S4)</i>                                                                                                                                                                    | F214:3D-WaveP1-L2-25, F216:3D-WaveP1-L2-27<br><i>(refer to Supplemental Table S4)</i>                                                                                                                                            |
|                                                                   | [>5 to ≤10]              | F60:3D-Laws-2<br><i>(for additional features refer to Supplemental Table S4)</i>                                                                                                                                                                                               | F215:3D-WaveP1-L2-26, F60:3D-Laws-2<br><i>(for additional features refer to Supplemental Table S4)</i>                                                                                                                           |

**Supplemental Table S7.** Summary of Area under the Receiver operative characteristics (AUC) between training on a CT images with consistent convolution kernel type to testing on an image with different reconstruction kernel. In the summary tables, a) training with Siemens B30F, 2mm b) training with GE Standard, 2.5mm, c) training with mixed scans & slice thickness d) Features for difference AUC difference range.

| Features                                                      | (a) Difference in test AUC: Cancer Vs Normal Discrimination<br>(Training: CT on Siemens B30F, 2mm (D1) ) |                                       |                                    |                                    |                                          |                                                    |                                                |                                    |                              |
|---------------------------------------------------------------|----------------------------------------------------------------------------------------------------------|---------------------------------------|------------------------------------|------------------------------------|------------------------------------------|----------------------------------------------------|------------------------------------------------|------------------------------------|------------------------------|
|                                                               | Difference Range                                                                                         | $\Delta(D1$<br>Vs 30F,<br>5mm)<br>(%) | $\Delta(D1$<br>Vs 50F,<br>2mm) (%) | $\Delta(D1$<br>Vs 50F,<br>5mm) (%) | $\Delta(D1$<br>Vs All<br>Siemens)<br>(%) | $\Delta(D1$<br>Vs GE<br>Standard,<br>2.5mm)<br>(%) | $\Delta(D1$<br>Vs GE<br>Bone,<br>2.5mm)<br>(%) | { $\Delta(D1$<br>Vs All<br>GE) (%) | { $\Delta(D1$<br>Vs All) (%) |
| <b>Size &amp; Shape</b><br>(17 features)                      | $\geq 0, \leq 5\%$                                                                                       | 12<br>(70.59)                         | 11 (64.71)                         | 10 (58.82)                         | 13 (76.47)                               | 6 (35.29)                                          | 3 (17.65)                                      | 10<br>(58.82)                      | 13 (76.47)                   |
|                                                               | $> 5, \leq 10\%$                                                                                         | 5<br>(29.41)                          | 2 (11.76)                          | 3 (17.65)                          | 1 (5.88)                                 | 5 (29.41)                                          | 7 (41.18)                                      | 3<br>(17.65)                       | 2 (11.76)                    |
|                                                               | $>10, \leq 15\%$                                                                                         | 0 (0)                                 | 0 (0)                              | 0 (0)                              | 1 (5.88)                                 | 1 (5.88)                                           | 3 (17.65)                                      | 1 (5.88)                           | 1 (5.88)                     |
|                                                               | $>15, \leq 20\%$                                                                                         | 0 (0)                                 | 2 (11.76)                          | 0 (0)                              | 1 (5.88)                                 | 2 (11.76)                                          | 2 (11.76)                                      | 1 (5.88)                           | 1 (5.88)                     |
|                                                               | $>20, \leq 30\%$                                                                                         | 0 (0)                                 | 0 (0)                              | 1 (5.88)                           | 1 (5.88)                                 | 1 (5.88)                                           | 2 (11.76)                                      | 2<br>(11.76)                       | 0<br>(0)                     |
|                                                               | $>30, \leq 50\%$                                                                                         | 0 (0)                                 | 2 (11.76)                          | 2 (11.76)                          | 0 (0)                                    | 2 (11.76)                                          | 0 (0)                                          | 0 (0)                              | 0 (0)                        |
|                                                               | $>50\%$                                                                                                  | 0 (0)                                 | 0 (0)                              | 1 (5.88)                           | 0 (0)                                    | 0 (0)                                              | 0 (0)                                          | 0 (0)                              | 0 (0)                        |
| <b>Location, RunL, CoOcc &amp; Histogram</b><br>(26 features) | $\geq 0, \leq 5\%$                                                                                       | 13<br>(50)                            | 12 (46.15)                         | 9 (34.62)                          | 16 (61.54)                               | 7 (26.92)                                          | 8 (30.77)                                      | 6<br>(23.08)                       | 11 (42.31)                   |
|                                                               | $> 5, \leq 10\%$                                                                                         | 7<br>(26.92)                          | 3 (11.54)                          | 5 (19.23)                          | 3 (11.54)                                | 4 (15.38)                                          | 5 (19.23)                                      | 9<br>(34.62)                       | 4 (15.38)                    |
|                                                               | $>10, \leq 15\%$                                                                                         | 3<br>(11.54)                          | 3 (11.54)                          | 4 (15.38)                          | 2 (7.69)                                 | 8 (30.77)                                          | 7 (26.92)                                      | 3<br>(11.54)                       | 9 (34.62)                    |
|                                                               | $>15, \leq 20\%$                                                                                         | 1 (3.85)                              | 2 (7.69)                           | 1 (3.85)                           | 1 (3.85)                                 | 2 (7.69)                                           | 1 (3.85)                                       | 3<br>(11.54)                       | 1 (3.85)                     |
|                                                               | $>20, \leq 30\%$                                                                                         | 1 (3.85)                              | 1 (3.85)                           | 3 (11.54)                          | 4 (15.38)                                | 4 (15.38)                                          | 5 (19.23)                                      | 5<br>(19.23)                       | 1 (3.85)                     |
|                                                               | $>30, \leq 50\%$                                                                                         | 1 (3.85)                              | 2 (7.69)                           | 1 (3.85)                           | 0 (0)                                    | 1 (3.85)                                           | 0 (0)                                          | 0 (0)                              | 0 (0)                        |
|                                                               | $>50\%$                                                                                                  | 0 (0)                                 | 3 (11.54)                          | 3 (11.54)                          | 0 (0)                                    | 0 (0)                                              | 0 (0)                                          | 0 (0)                              | 0 (0)                        |
| <b>Texture: Laws &amp; Wavelets</b><br>(86 features)          | $\geq 0, \leq 5\%$                                                                                       | 81<br>(94.19)                         | 84 (97.67)                         | 82 (95.35)                         | 84 (97.67)                               | 83 (96.51)                                         | 82 (95.35)                                     | 82<br>(95.35)                      | 84 (97.67)                   |
|                                                               | $> 5, \leq 10\%$                                                                                         | 3 (3.49)                              | 0 (0)                              | 2 (2.33)                           | 0 (0)                                    | 2 (2.33)                                           | 1 (1.16)                                       | 2 (2.33)                           | 0 (0)                        |
|                                                               | $>10, \leq 15\%$                                                                                         | 1 (1.16)                              | 0 (0)                              | 0 (0)                              | 0 (0)                                    | 1 (1.16)                                           | 2 (2.33)                                       | 2 (2.33)                           | 0 (0)                        |
|                                                               | $>15, \leq 20\%$                                                                                         | 1<br>(1.163)                          | 0 (0)                              | 0 (0)                              | 0 (0)                                    | 0 (0)                                              | 1 (1.16)                                       | 0 (0)                              | 2 (2.33)                     |
|                                                               | $>20, \leq 30\%$                                                                                         | 0 (0)                                 | 0 (0)                              | 0 (0)                              | 2 (2.33)                                 | 0 (0)                                              | 0 (0)                                          | 0 (0)                              | 0 (0)                        |
|                                                               | $>30, \leq 50\%$                                                                                         | 0 (0)                                 | 0 (0)                              | 0 (0)                              | 0 (0)                                    | 0 (0)                                              | 0 (0)                                          | 0 (0)                              | 0 (0)                        |
|                                                               | $>50\%$                                                                                                  | 0 (0)                                 | 2 (2.33)                           | 2 (2.33)                           | 0 (0)                                    | 0 (0)                                              | 0 (0)                                          | 0 (0)                              | 0 (0)                        |

**SUPPLEMENTALS:** *Quantitative Imaging Features Improves Discrimination of Malignancy in Pulmonary Nodules (Y. Balagurunathan et al.)*

| Features Category                                             | (b) Difference in test AUC: Cancer Vs Normal Discrimination<br>(Training: GE Standard, 2.5 mm (D2)) |                                |                                |                                |                                |                                   |                                         |                                |                          |
|---------------------------------------------------------------|-----------------------------------------------------------------------------------------------------|--------------------------------|--------------------------------|--------------------------------|--------------------------------|-----------------------------------|-----------------------------------------|--------------------------------|--------------------------|
|                                                               | Difference Range                                                                                    | $\Delta(D2$<br>Vs 30F,<br>2mm) | $\Delta(D2$<br>Vs 30F,<br>5mm) | $\Delta(D2$<br>Vs 50F,<br>2mm) | $\Delta(D2$<br>Vs 50F,<br>5mm) | $\Delta(D2$<br>Vs All<br>Siemens) | $\Delta(D2$<br>Vs GE<br>Bone,<br>2.5mm) | $\{\Delta(D2$<br>Vs All<br>GE) | $\{\Delta(D2$<br>Vs All) |
| <b>Size &amp; Shape</b><br>(17 features)                      | $\geq 0, \leq 5\%$                                                                                  | 6 (35.29)                      | 4 (23.53)                      | 4 (23.53)                      | 3 (17.65)                      | 6 (35.29)                         | 8 (47.06)                               | 12 (70.59)                     | 9 (52.94)                |
|                                                               | $> 5, \leq 10\%$                                                                                    | 5 (29.41)                      | 6 (35.29)                      | 6 (35.29)                      | 6 (35.29)                      | 6 (35.29)                         | 6 (35.29)                               | 1 (5.88)                       | 3 (17.65)                |
|                                                               | $>10, \leq 15\%$                                                                                    | 0 (0)                          | 3 (17.65)                      | 3 (17.65)                      | 3 (17.65)                      | 0 (0)                             | 3 (17.65)                               | 3 (17.65)                      | 1 (5.88)                 |
|                                                               | $>15, \leq 20\%$                                                                                    | 3 (17.65)                      | 0 (0)                          | 1 (5.88)                       | 0 (0)                          | 2 (11.76)                         | 0 (0)                                   | 1 (5.88)                       | 2 (11.76)                |
|                                                               | $>20, \leq 30\%$                                                                                    | 2 (11.76)                      | 2 (11.76)                      | 2 (11.76)                      | 2 (11.76)                      | 2 (11.76)                         | 0 (0)                                   | 0 (0)                          | 1 (5.88)                 |
|                                                               | $>30, \leq 50\%$                                                                                    | 1 (5.88)                       | 2 (11.76)                      | 0 (0)                          | 2 (11.76)                      | 1 (5.88)                          | 0 (0)                                   | 0 (0)                          | 1 (5.88)                 |
|                                                               | $>50\%$                                                                                             | 0 (0)                          | 0 (0)                          | 1 (5.88)                       | 1 (5.88)                       | 0 (0)                             | 0 (0)                                   | 0 (0)                          | 0 (0)                    |
| <b>Location, RunL, CoOcc &amp; Histogram</b><br>(26 features) | $\geq 0, \leq 5\%$                                                                                  | 7 (26.92%)                     | 3 (11.54%)                     | 7 (26.92%)                     | 3 (11.54%)                     | 5 (19.23%)                        | 11 (42.31%)                             | 11 (42.31%)                    | 6 (23.08%)               |
|                                                               | $> 5, \leq 10\%$                                                                                    | 4 (15.38%)                     | 3 (11.54%)                     | 5 (19.23%)                     | 11 (42.31%)                    | 5 (19.23%)                        | 10 (38.46%)                             | 14 (53.85%)                    | 9 (34.62%)               |
|                                                               | $>10, \leq 15\%$                                                                                    | 3 (11.54%)                     | 5 (19.23%)                     | 5 (19.23%)                     | 5 (19.23%)                     | 3 (11.54%)                        | 5 (19.23%)                              | 1 (3.85%)                      | 7 (26.92%)               |
|                                                               | $>15, \leq 20\%$                                                                                    | 8 (30.77%)                     | 3 (11.54%)                     | 2 (7.69%)                      | 1 (3.85%)                      | 8 (30.77%)                        | 0 (0%)                                  | 0 (0%)                         | 3 (11.54%)               |
|                                                               | $>20, \leq 30\%$                                                                                    | 4 (15.38%)                     | 10 (38.46%)                    | 3 (11.54%)                     | 2 (7.69%)                      | 4 (15.38%)                        | 0 (0%)                                  | 0 (0%)                         | 0 (0%)                   |
|                                                               | $>30, \leq 50\%$                                                                                    | 0 (0%)                         | 2 (7.69%)                      | 1 (3.85%)                      | 1 (3.85%)                      | 1 (3.85%)                         | 0 (0%)                                  | 0 (0%)                         | 1 (3.85%)                |
|                                                               | $>50\%$                                                                                             | 0 (0%)                         | 0 (0%)                         | 3 (11.54%)                     | 3 (11.54%)                     | 0 (0%)                            | 0 (0%)                                  | 0 (0%)                         | 0 (0%)                   |
| <b>Texture: Laws &amp; Wavelets</b><br>(86 features)          | $\geq 0, \leq 5\%$                                                                                  | 83 (96.51)                     | 81 (94.19)                     | 81 (94.19)                     | 82 (95.35)                     | 81 (94.19)                        | 83 (96.51)                              | 86 (100)                       | 81 (94.19)               |
|                                                               | $> 5, \leq 10\%$                                                                                    | 1 (1.16)                       | 1 (1.16)                       | 3 (3.49)                       | 1 (1.16)                       | 0 (0)                             | 2 (2.33)                                | 0 (0)                          | 3 (3.49)                 |
|                                                               | $>10, \leq 15\%$                                                                                    | 2 (2.33)                       | 2 (2.33)                       | 0 (0)                          | 1 (1.16)                       | 3 (3.49)                          | 1 (1.16)                                | 0 (0)                          | 1 (1.16)                 |
|                                                               | $>15, \leq 20\%$                                                                                    | 0 (0)                          | 1 (1.16)                       | 0 (0)                          | 0 (0)                          | 0 (0)                             | 0 (0)                                   | 0 (0)                          | 1 (1.16)                 |
|                                                               | $>20, \leq 30\%$                                                                                    | 0 (0)                          | 1 (1.16)                       | 0 (0)                          | 0 (0)                          | 2 (2.33)                          | 0 (0)                                   | 0 (0)                          | 0 (0)                    |
|                                                               | $>30, \leq 50\%$                                                                                    | 0 (0)                          | 0 (0)                          | 0 (0)                          | 1 (1.16)                       | 0 (0)                             | 0 (0)                                   | 0 (0)                          | 0 (0)                    |
|                                                               | $>50\%$                                                                                             | 0 (0)                          | 0 (0)                          | 2 (2.33)                       | 1 (1.16)                       | 0 (0)                             | 0 (0)                                   | 0 (0)                          | 0 (0)                    |

**SUPPLEMENTALS: Quantitative Imaging Features Improves Discrimination of Malignancy in Pulmonary Nodules (Y. Balagurunathan et al.)**

| Features Category                                                     | (c)Difference in test AUC: Cancer Vs Normal Discrimination<br>(Training: All available – Siemens & GE, (D3) ) |                                |                                |                                |                                |                                   |                                             |                                         |                                |
|-----------------------------------------------------------------------|---------------------------------------------------------------------------------------------------------------|--------------------------------|--------------------------------|--------------------------------|--------------------------------|-----------------------------------|---------------------------------------------|-----------------------------------------|--------------------------------|
|                                                                       | Difference Range                                                                                              | $\Delta(D3$<br>Vs 30F,<br>2mm) | $\Delta(D3$<br>Vs 30F,<br>5mm) | $\Delta(D3$<br>Vs 50F,<br>2mm) | $\Delta(D3$<br>Vs 50F,<br>5mm) | $\Delta(D3$<br>Vs All<br>Siemens) | $\Delta(D3$<br>Vs GE<br>Standard,<br>2.5mm) | $\Delta(D3$<br>Vs GE<br>Bone,<br>2.5mm) | $\{\Delta(D3$<br>Vs All<br>GE) |
| <b>Size &amp; Shape</b><br>(17 features)                              | $\geq 0, \leq 5\%$                                                                                            | 13<br>(76.47)                  | 14<br>(82.35)                  | 12<br>(70.59)                  | 11<br>(64.71)                  | 16<br>(94.12)                     | 10<br>(58.82)                               | 4<br>(23.53)                            | 12<br>(70.59)                  |
|                                                                       | $> 5, \leq 10\%$                                                                                              | 2<br>(11.76)                   | 2<br>(11.76)                   | 1 (5.88)                       | 2<br>(11.76)                   | 0 (0)                             | 2 (11.76)                                   | 8<br>(47.06)                            | 3<br>(17.65)                   |
|                                                                       | $>10, \leq 15\%$                                                                                              | 1 (5.88)                       | 1 (5.88)                       | 1 (5.88)                       | 0 (0)                          | 1 (5.88)                          | 0 (0)                                       | 2<br>(11.76)                            | 0 (0)                          |
|                                                                       | $>15, \leq 20\%$                                                                                              | 1 (5.88)                       | 0 (0)                          | 1 (5.88)                       | 1 (5.88)                       | 0 (0)                             | 2 (11.76)                                   | 2<br>(11.76)                            | 1 (5.88)                       |
|                                                                       | $>20, \leq 30\%$                                                                                              | 0 (0)                          | 0 (0)                          | 1 (5.88)                       | 1 (5.88)                       | 0 (0)                             | 1 (5.88)                                    | 0 (0)                                   | 0 (0)                          |
|                                                                       | $>30, \leq 50\%$                                                                                              | 0 (0)                          | 0 (0)                          | 1 (5.88)                       | 2<br>(11.76)                   | 0 (0)                             | 1 (5.88)                                    | 1 (5.88)                                | 1 (5.88)                       |
|                                                                       | $>50\%$                                                                                                       | 0 (0)                          | 0 (0)                          | 0 (0)                          | 0 (0)                          | 0 (0)                             | 1 (5.88)                                    | 0 (0)                                   | 0 (0)                          |
| <b>Location,<br/>RunL, CoOcc<br/>&amp; Histogram</b><br>(26 features) | $\geq 0, \leq 5\%$                                                                                            | 11<br>(42.31)                  | 11<br>(42.31)                  | 11<br>(42.31)                  | 14<br>(53.85)                  | 16<br>(61.54)                     | 7 (26.92)                                   | 11<br>(42.31)                           | 8<br>(30.77)                   |
|                                                                       | $> 5, \leq 10\%$                                                                                              | 4<br>(15.39)                   | 8<br>(30.77)                   | 4<br>(15.39)                   | 4<br>(15.39)                   | 3 (11.54)                         | 6 (23.08)                                   | 5<br>(19.23)                            | 9<br>(34.62)                   |
|                                                                       | $>10, \leq 15\%$                                                                                              | 10<br>(38.46)                  | 2 (7.69)                       | 5<br>(19.23)                   | 2 (7.69)                       | 7 (26.92)                         | 10<br>(38.46)                               | 7<br>(26.92)                            | 5<br>(19.23)                   |
|                                                                       | $>15, \leq 20\%$                                                                                              | 0 (0)                          | 3<br>(11.54)                   | 1 (3.85)                       | 1 (3.85)                       | 0 (0)                             | 1 (3.85)                                    | 1 (3.85)                                | 2 (7.69)                       |
|                                                                       | $>20, \leq 30\%$                                                                                              | 1 (3.85)                       | 2 (7.69)                       | 2 (7.69)                       | 2 (7.69)                       | 0 (0)                             | 1 (3.85)                                    | 1 (3.85)                                | 1 (3.85)                       |
|                                                                       | $>30, \leq 50\%$                                                                                              | 0 (0)                          | 0 (0)                          | 1 (3.85)                       | 1 (3.85)                       | 0 (0)                             | 1 (3.85)                                    | 1 (3.85)                                | 1 (3.85)                       |
|                                                                       | $>50\%$                                                                                                       | 0 (0)                          | 0 (0)                          | 2 (7.69)                       | 2 (7.69)                       | 0 (0)                             | 0 (0)                                       | 0 (0)                                   | 0 (0)                          |
| <b>Texture: Laws<br/>&amp; Wavelets</b><br>(86 features)              | $\geq 0, \leq 5\%$                                                                                            | 84<br>(97.67)                  | 82<br>(95.35)                  | 84<br>(97.67)                  | 84<br>(97.67)                  | 84<br>(97.67)                     | 81<br>(94.19)                               | 81<br>(94.19)                           | 81<br>(94.19)                  |
|                                                                       | $> 5, \leq 10\%$                                                                                              | 0 (0)                          | 2 (2.33)                       | 0 (0)                          | 0 (0)                          | 1 (1.16)                          | 3 (3.49)                                    | 0 (0)                                   | 3 (3.49)                       |
|                                                                       | $>10, \leq 15\%$                                                                                              | 0 (0)                          | 2 (2.33)                       | 0 (0)                          | 0 (0)                          | 1 (1.16)                          | 0 (0)                                       | 3 (3.49)                                | 1 (1.16)                       |
|                                                                       | $>15, \leq 20\%$                                                                                              | 0 (0)                          | 0 (0)                          | 0 (0)                          | 0 (0)                          | 0 (0)                             | 2 (2.33)                                    | 0 (0)                                   | 0 (0)                          |
|                                                                       | $>20, \leq 30\%$                                                                                              | 2 (2.33)                       | 0 (0)                          | 0 (0)                          | 0 (0)                          | 0 (0)                             | 0 (0)                                       | 1 (1.16)                                | 1 (1.16)                       |
|                                                                       | $>30, \leq 50\%$                                                                                              | 0 (0)                          | 0 (0)                          | 1 (1.16)                       | 2 (2.33)                       | 0 (0)                             | 0 (0)                                       | 1 (1.16)                                | 0 (0)                          |
|                                                                       | $>50\%$                                                                                                       | 0 (0)                          | 0 (0)                          | 1 (1.16)                       | 0 (0)                          | 0 (0)                             | 0 (0)                                       | 0 (0)                                   | 0 (0)                          |

*See Attached excel sheet for details, three worksheets corresponds to a),b) & c) (SupplementalTableS5 ExcelSheetAttach forREconAUC.xlsx)*

*(Picture shown for reference).*

| GID-1                 | Catg3 | CategoryDesc              | Error-HoldOut(train: | DeltaAUC | DeltaAUC | DeltaAUC | DeltaAUC | DeltaAUC | DeltaAUC | DeltaAUC | DeltaAUC | DeltaAUC |
|-----------------------|-------|---------------------------|----------------------|----------|----------|----------|----------|----------|----------|----------|----------|----------|
| F1:LongDia            | 1     | Size&Shape                | 0.251052             | 0.011882 | 0.000276 | 0.006986 | 0.002493 | 0.00806  | 0.069634 | 0.030601 | 0.002609 |          |
| F2:ShortAx-LongDia    | 1     | Size&Shape                | 0.25421              | 0.026203 | 0.001301 | 0.007758 | 0.014031 | 0.000719 | 0.072462 | 0.005157 | 0.013482 |          |
| F3:ShortAx            | 1     | Size&Shape                | 0.251579             | 0.050865 | 0.011846 | 0.057256 | 0.030358 | 0.002989 | 0.05322  | 0.026108 | 0.034412 |          |
| F6:Vol-cm             | 1     | Size&Shape                | 0.323421             | 0.015049 | 0.007617 | 0.015458 | 0.007618 | 0.062601 | 0.10487  | 0.050027 | 0.019125 |          |
| F14:9c-3D-Compact     | 1     | Size&Shape                | 0.320526             | 0.033137 | 0.045698 | 0.036644 | 0.018729 | 0.064421 | 0.086615 | 0.033082 | 0.008425 |          |
| F23:Asymmetry         | 1     | Size&Shape                | 0.522105             | 0.099831 | 0.1859   | 0.072061 | 0.016957 | 0.394459 | 0.202585 | 0.20183  | 0.022916 |          |
| F25:Density           | 1     | Size&Shape                | 0.390789             | 0.042439 | 0.061661 | 0.079356 | 0.014618 | 0.21899  | 0.172276 | 0.01236  | 0.010744 |          |
| F26:EllipticFit       | 1     | Size&Shape                | 0.327105             | 0.004717 | 0.064888 | 0.224693 | 0.050632 | 0.131742 | 0.178827 | 0.126138 | 0.060932 |          |
| F30:Shape-Index       | 1     | Size&Shape                | 0.20421              | 0.003737 | 0.007423 | 0.010665 | 0.018651 | 0.065421 | 0.077359 | 0.054947 | 0.031212 |          |
| F32:RectangularFit    | 1     | Size&Shape                | 0.313947             | 0.098975 | 0.353209 | 0.378504 | 0.156432 | 0.173265 | 0.100584 | 0.150655 | 0.150989 |          |
| F34:Volume-pxl        | 1     | Size&Shape                | 0.311315             | 0.021356 | 0.01971  | 0.033275 | 0.00823  | 0.051777 | 0.070537 | 0.026877 | 0.002561 |          |
| F36:Width-Pxl         | 1     | Size&Shape                | 0.231579             | 0.020001 | 0.035822 | 0.039255 | 0.016835 | 0.031354 | 0.039987 | 0.012991 | 0.005954 |          |
| F37:Thickness-Pxl     | 1     | Size&Shape                | 0.219737             | 0.021522 | 0.017427 | 0.020365 | 0.013559 | 0.161605 | 0.116332 | 0.077418 | 0.00793  |          |
| F38:Length-Pxl        | 1     | Size&Shape                | 0.231842             | 0.012767 | 0.003524 | 0.026886 | 0.003639 | 0.006034 | 0.045112 | 0.025575 | 0.006407 |          |
| F39:Length-by-Thick   | 1     | Size&Shape                | 0.518158             | 0.099633 | 0.492261 | 0.587099 | 0.24726  | 0.462753 | 0.255445 | 0.25463  | 0.130097 |          |
| F40:Length-by-Width   | 1     | Size&Shape                | 0.402105             | 0.061396 | 0.197231 | 0.356485 | 0.108498 | 0.07375  | 0.048823 | 0.006717 | 0.071924 |          |
| F41:Border-Leng-Pxl   | 1     | Size&Shape                | 0.248684             | 0.031032 | 0.024158 | 0.021892 | 0.016635 | 0.041201 | 0.061711 | 0.022494 | 0.005118 |          |
| F4:Mn-Hu              | 2     | Location,RunI,CoOc,Histog | 0.484474             | 0.029247 | 0.022321 | 0.001396 | 0.008131 | 0.216834 | 0.204906 | 0.233714 | 0.114302 |          |
| F5:Std-Hu             | 2     | Location,RunI,CoOc,Histog | 0.523947             | 0.068391 | 0.304199 | 0.258283 | 0.102381 | 0.203426 | 0.126167 | 0.141743 | 0.106379 |          |
| F8:8a-3D-Atch-Pleural | 2     | Location,RunI,CoOc,Histog | 0.468684             | 0.097856 | 0.088984 | 0.143782 | 0.083896 | 0.058377 | 0.126835 | 0.120437 | 0.090831 |          |
| F9:8b-3D-Bord-to-Lung | 2     | Location,RunI,CoOc,Histog | 0.519737             | 0        | 0        | 0        | 0        | 0        | 0        | 0        | 0        |          |
| F12:9a-3D-FractionalA | 2     | Location,RunI,CoOc,Histog | 0.513684             | 0.113079 | 0.506827 | 0.61404  | 0.255217 | 0.363974 | 0.202238 | 0.187905 | 0.148089 |          |
| F16:9e-3D-SD-Dist-CO  | 2     | Location,RunI,CoOc,Histog | 0.279473             | 0.013379 | 0.147838 | 0.039252 | 0.067183 | 0.061201 | 0.024266 | 0.002641 | 0.051372 |          |
| F17:9f-3D-Min-Dist-CO | 2     | Location,RunI,CoOc,Histog | 0.269473             | 0.035675 | 0.205066 | 0.281802 | 0.051238 | 0.207759 | 0.206854 | 0.164989 | 0.057687 |          |
| F19:10a-3D-Relat-Vol- | 2     | Location,RunI,CoOc,Histog | 0.438421             | 0.022625 | 0.02381  | 0.011777 | 0.022077 | 0.18749  | 0.141031 | 0.204742 | 0.082249 |          |
| F20:10b-3D-Num-AirSc  | 2     | Location,RunI,CoOc,Histog | 0.432368             | 0.366828 | 0.194019 | 0.247731 | 0.203267 | 0.179547 | 0.209154 | 0.205256 | 0.270521 |          |
| F21:10c-3D-Av-Vol-Air | 2     | Location,RunI,CoOc,Histog | 0.446579             | 0.013327 | 0.036036 | 0.108599 | 0.016287 | 0.231495 | 0.080979 | 0.26162  | 0.125037 |          |
| F22:10d-3D-SD-Vol-Air | 2     | Location,RunI,CoOc,Histog | 0.450789             | 0.196736 | 0.047799 | 0.156945 | 0.119111 | 0.046925 | 0.08809  | 0.110334 | 0.14486  |          |
| F27:Main-Direction    | 2     | Location,RunI,CoOc,Histog | 0.50579              | 0.209447 | 0.44785  | 0.495676 | 0.244101 | 0.078444 | 0.010103 | 0.052459 | 0.17178  |          |
| F42:AvgCoOc-Homo      | 2     | Location,RunI,CoOc,Histog | 0.198158             | 0.065374 | 0.033375 | 0.059183 | 0.006297 | 0.129314 | 0.077992 | 0.076501 | 0.010221 |          |
| F43:AvgCooc-Mp        | 2     | Location,RunI,CoOc,Histog | 0.21421              | 0.063269 | 0.030206 | 0.056288 | 0.006823 | 0.137937 | 0.075339 | 0.078527 | 0.010494 |          |
| F44:AvgCooc-Constras  | 2     | Location,RunI,CoOc,Histog | 0.362105             | 0.112467 | 0.599922 | 0.561819 | 0.194334 | 0.006405 | 0.006405 | 0.035579 | 0.104231 |          |
| F45:AvgCooc-Energy    | 2     | Location,RunI,CoOc,Histog | 0.24                 | 0.058361 | 0.042287 | 0.066052 | 0.000252 | 0.141379 | 0.066092 | 0.078871 | 0.016604 |          |
| F47:AvgCoOc-Mean      | 2     | Location,RunI,CoOc,Histog | 0.435263             | 0.109865 | 0.604368 | 0.585377 | 0.20049  | 0.028344 | 0.105348 | 0.056271 | 0.115099 |          |
| F48:AvgGLN            | 2     | Location,RunI,CoOc,Histog | 0.353421             | 0.021943 | 0.013196 | 0.019992 | 0.012016 | 0.077095 | 0.123825 | 0.057396 | 0.005424 |          |
| F51:AvgLRE            | 2     | Location,RunI,CoOc,Histog | 0.202631             | 0        | 0        | 0        | 0        | 0        | 0        | 0        | 0        |          |
| F52:AvgLRHGE          | 2     | Location,RunI,CoOc,Histog | 0.348684             | 0.023498 | 0.076736 | 0.068443 | 0.014227 | 0.147217 | 0.238959 | 0.210447 | 0.111219 |          |
| F55:AvgRP             | 2     | Location,RunI,CoOc,Histog | 0.232631             | 0.01845  | 0.015738 | 0.006809 | 0.010459 | 0.110921 | 0.142914 | 0.070215 | 0.007374 |          |
| F185:Hist-SD-L1       | 2     | Location,RunI,CoOc,Histog | 0.352631             | 0.089286 | 0.15303  | 0.110178 | 0.020804 | 0.10636  | 0.005589 | 0.057586 | 0.026859 |          |
| F186:Hist-Energy-L1   | 2     | Location,RunI,CoOc,Histog | 0.292894             | 0        | 0        | 0        | 0        | 0        | 0        | 0        | 0        |          |
| F187:Hist-Entropy-L1  | 2     | Location,RunI,CoOc,Histog | 0.239473             | 0.009735 | 0.051268 | 0.035237 | 0.021318 | 0.132757 | 0.103388 | 0.063247 | 0.001186 |          |
| F188:Hist-Kurt-L1     | 2     | Location,RunI,CoOc,Histog | 0.45421              | 0.080238 | 0.13225  | 0.121017 | 0.000912 | 0.015025 | 0.01463  | 0.015003 | 0.000388 |          |
| F189:Hist-Skew-L1     | 2     | Location,RunI,CoOc,Histog | 0.506053             | 0.047678 | 0.131245 | 0.096708 | 0.016077 | 0.140308 | 0.178383 | 0.183487 | 0.104507 |          |
| F59:3D-Laws-1         | 3     | Texture:Laws&Wavelet      | 0.534474             | 0        | 0        | 0        | 0        | 0        | 0        | 0        | 0        |          |
| F60:3D-Laws-2         | 3     | Texture:Laws&Wavelet      | 0.384473             | 0.108681 | 0.575153 | 0.583323 | 0.252406 | 0.028362 | 0.04559  | 0.052216 | 0.171183 |          |
| F62:3D-Laws-4         | 3     | Texture:Laws&Wavelet      | 0.535                | 0        | 0        | 0        | 0        | 0        | 0        | 0        | 0        |          |
| F63:3D-Laws-5         | 3     | Texture:Laws&Wavelet      | 0.46                 | 0        | 0        | 0        | 0        | 0        | 0        | 0        | 0        |          |
| F64:3D-Laws-6         | 3     | Texture:Laws&Wavelet      | 0.364473             | 0        | 0        | 0        | 0        | 0        | 0        | 0        | 0        |          |
| F67:3D-Laws-9         | 3     | Texture:Laws&Wavelet      | 0.406842             | 0        | 0        | 0        | 0        | 0        | 0        | 0        | 0        |          |
| F68:3D-Laws-10        | 3     | Texture:Laws&Wavelet      | 0.397368             | 0        | 0        | 0        | 0        | 0        | 0        | 0        | 0        |          |
| F69:3D-Laws-11        | 3     | Texture:Laws&Wavelet      | 0.519474             | 0        | 0        | 0        | 0        | 0        | 0        | 0        | 0        |          |
| F72:3D-Laws-14        | 3     | Texture:Laws&Wavelet      | 0.525263             | 0        | 0        | 0        | 0        | 0        | 0        | 0        | 0        |          |
| F73:3D-Laws-15        | 3     | Texture:Laws&Wavelet      | 0.527105             | 0        | 0        | 0        | 0        | 0        | 0        | 0        | 0        |          |
| F74:3D-Laws-16        | 3     | Texture:Laws&Wavelet      | 0.44421              | 0        | 0        | 0        | 0        | 0        | 0        | 0        | 0        |          |
| F75:3D-Laws-17        | 3     | Texture:Laws&Wavelet      | 0.520526             | 0        | 0        | 0        | 0        | 0        | 0        | 0        | 0        |          |
| F76:3D-Laws-18        | 3     | Texture:Laws&Wavelet      | 0.321842             | 0        | 0        | 0        | 0        | 0        | 0        | 0        | 0        |          |
| F77:3D-Laws-19        | 3     | Texture:Laws&Wavelet      | 0.481316             | 0        | 0        | 0        | 0        | 0        | 0        | 0        | 0        |          |
| F78:3D-Laws-20        | 3     | Texture:Laws&Wavelet      | 0.382631             | 0        | 0        | 0        | 0        | 0        | 0        | 0        | 0        |          |
| F79:3D-Laws-21        | 3     | Texture:Laws&Wavelet      | 0.537368             | 0        | 0        | 0        | 0        | 0        | 0        | 0        | 0        |          |
| F80:3D-Laws-22        | 3     | Texture:Laws&Wavelet      | 0.416842             | 0        | 0        | 0        | 0        | 0        | 0        | 0        | 0        |          |
| F82:3D-Laws-24        | 3     | Texture:Laws&Wavelet      | 0.51                 | 0        | 0        | 0        | 0        | 0        | 0        | 0        | 0        |          |
| F83:3D-Laws-25        | 3     | Texture:Laws&Wavelet      | 0.506316             | 0        | 0        | 0        | 0        | 0        | 0        | 0        | 0        |          |

**Key for Abbreviations Used in the Classifier Results Section:**

Error: Classifier error (1- Accuracy)

Sensitivity(or Recall): True Positive Rate (TPR) =>(True Positive/True Positive + False Negative)

Specificity: True Negative Rate (TNR) => (True Negative/True Negative + False Positive)

PPV (or Precision): Positive predictive value: => (True Positive/True Positive + False positive)

NPV: Negative Predictive value => (True negative/True negative + False negative)

AUC: Area under the Receiver Operator Curve

CI: Confidence Limits (on AUC).

**Table S8.** Top images features discriminating cancer to benign nodules using 129reproducible, non-redundant features. A) performance of radiomic model with increasing feature dimension and B) four feature predictors , across all feature category types.

A)

| All categories: Cancer Vs Normal (129 Reproducible, Non-Redundant Features) – Hold out CV |            |                                                         |          |                            |                      |
|-------------------------------------------------------------------------------------------|------------|---------------------------------------------------------|----------|----------------------------|----------------------|
|                                                                                           | Dimensions | Feature                                                 | E[Error] | E[Sen], E[Spec], (J-index) | E[AUC], with CI      |
| 1                                                                                         | 4 Features | F3:ShortAx, F4:Mn-Hu,,F26:EllipticFit, F150:3D-Laws-101 | 0.202    | 0.484, 0.929, (0.414)      | 0.834 [0.689,0.939]  |
| 2                                                                                         | 3 Features | F3:ShortAx, F4:Mn-Hu, F26:EllipticFit                   | 0.235    | 0.506, 0.928, (0.435)      | 0.842 [0.71, 0.93]   |
| 3                                                                                         | 2 Features | F4:Mn-Hu, F37:Thickness-Pxl                             | 0.271    | 0.462, 0.945, (0.407)      | 0.827 [0.694, 0.936] |
| 4                                                                                         | 1 Feature  | F1:LongDia                                              | 0.239    | 0.396, 0.945, (0.340)      | 0.786 [0.603, 0.916] |

B)

| <b>TRAINING (4 Feature) : Primary : Cancer Vs Norm ( 78 Vs 166)    All</b>                                  |       |             |             |       |       |                    |               |
|-------------------------------------------------------------------------------------------------------------|-------|-------------|-------------|-------|-------|--------------------|---------------|
| Features                                                                                                    | Error | Sensitivity | Specificity | PPV   | NPV   | AUC                |               |
|                                                                                                             |       |             |             |       |       | $\mu$ ( $\sigma$ ) | CI            |
| F19:10a-3D-Relat-Vol-Airspaces;F36:Width-Pxl;F48:AvgGLN;F192:3D-WaveP2-L2-3                                 | 0.213 | 0.573       | 0.891       | 0.717 | 0.815 | 0.728<br>(0.141)   | [0.522,0.927] |
| F19:10a-3D-Relat-Vol-Airspaces;F34:Volume-pxl;F37:Thickness-Pxl;F48:AvgGLN                                  | 0.211 | 0.505       | 0.929       | 0.777 | 0.796 | 0.801<br>(0.07)    | [0.652,0.921] |
| F19:10a-3D-Relat-Vol-Airspaces;F21:10c-3D-Av-Vol-AirSpaces;F32:RectangularFit;F198:3D-WaveP2-L2-9           | 0.211 | 0.538       | 0.911       | 0.746 | 0.806 | 0.818<br>(0.069)   | [0.66,0.948]  |
| F3:ShortAx;F4:Mn-Hu;F26:EllipticFit;F176:3D-Laws-127                                                        | 0.195 | 0.518       | 0.946       | 0.826 | 0.801 | 0.833<br>(0.055)   | [0.708,0.941] |
| F19:10a-3D-Relat-Vol-Airspaces;F21:10c-3D-Av-Vol-AirSpaces;F22:10d-3D-SD-Vol-AirSpaces;F201:3D-WaveP2-L2-12 | 0.207 | 0.605       | 0.891       | 0.735 | 0.817 | 0.825<br>(0.059)   | [0.704,0.933] |

| <b>ImageF+ClinC (4Feature): Primary (Canc Vs Norm)    Test (88 Vs 147)   All</b> |       |             |             |       |       |              |               |
|----------------------------------------------------------------------------------|-------|-------------|-------------|-------|-------|--------------|---------------|
| F1                                                                               | Error | Sensitivity | Specificity | PPV   | NPV   | AUC          | CI            |
| Comb1                                                                            | 0.224 | 0.483       | 0.912       | 0.72  | 0.793 | 0.793(0.067) | [0.634,0.937] |
| Comb2                                                                            | 0.231 | 0.435       | 0.929       | 0.75  | 0.775 | 0.798(0.057) | [0.678,0.892] |
| Comb6                                                                            | 0.222 | 0.474       | 0.919       | 0.736 | 0.791 | 0.81(0.058)  | [0.676,0.932] |
| Comb8                                                                            | 0.219 | 0.468       | 0.928       | 0.756 | 0.791 | 0.815(0.061) | [0.683,0.936] |
| Comb9                                                                            | 0.234 | 0.443       | 0.917       | 0.71  | 0.781 | 0.806(0.062) | [0.668,0.916] |

| <b>ClinC (4Feature): Primary (Canc Vs Norm)    Test (88 Vs 147)   All</b> |       |             |             |       |       |                  |               |
|---------------------------------------------------------------------------|-------|-------------|-------------|-------|-------|------------------|---------------|
| ClinC                                                                     | Error | Sensitivity | Specificity | PPV   | NPV   | AUC              | CI            |
| Age, Gender, Pky, Smoke-Status                                            | 0.325 | 0.003       | 0.997       | 0.022 | 0.677 | 0.522<br>(0.083) | [0.364,0.689] |



**SUPPLEMENTALS:** *Quantitative Imaging Features Improves Discrimination of Malignancy in Pulmonary Nodules (Y. Balagurunathan et al.)*

| <b>a. TESTING (4F: Img): Primary (Canc Vs Norm)    Test (88 Vs 147)   All</b>                               |              |                    |                    |            |            |            |
|-------------------------------------------------------------------------------------------------------------|--------------|--------------------|--------------------|------------|------------|------------|
| <b>F1</b>                                                                                                   | <b>Error</b> | <b>Sensitivity</b> | <b>Specificity</b> | <b>PPV</b> | <b>NPV</b> | <b>AUC</b> |
| F19:10a-3D-Relat-Vol-Airspaces;F36:Width-Pxl;F48:AvgGLN;F192:3D-WaveP2-L2-3                                 | 0.162        | 0.625              | 0.966              | 0.917      | 0.811      | 0.889      |
| F19:10a-3D-Relat-Vol-Airspaces;F34:Volume-pxl;F37:Thickness-Pxl;F48:AvgGLN                                  | 0.17         | 0.568              | 0.986              | 0.962      | 0.792      | 0.9        |
| F19:10a-3D-Relat-Vol-Airspaces;F21:10c-3D-Av-Vol-AirSpaces;F32:RectangularFit;F198:3D-WaveP2-L2-9           | 0.187        | 0.614              | 0.932              | 0.844      | 0.801      | 0.863      |
| F3:ShortAx;F4:Mn-Hu;F26:EllipticFit;F176:3D-Laws-127                                                        | 0.179        | 0.568              | 0.973              | 0.926      | 0.79       | 0.902      |
| F19:10a-3D-Relat-Vol-Airspaces;F21:10c-3D-Av-Vol-AirSpaces;F22:10d-3D-SD-Vol-AirSpaces;F201:3D-WaveP2-L2-12 | 0.191        | 0.614              | 0.925              | 0.831      | 0.8        | 0.872      |

| <b>b. TESTING (4F: Img+Clinic): Primary (Canc Vs Norm)    Test (88 Vs 147)   All</b> |              |                    |                    |            |            |            |
|--------------------------------------------------------------------------------------|--------------|--------------------|--------------------|------------|------------|------------|
| <b>F1</b>                                                                            | <b>Error</b> | <b>Sensitivity</b> | <b>Specificity</b> | <b>PPV</b> | <b>NPV</b> | <b>AUC</b> |
| Comb1                                                                                | 0.196        | 0.545              | 0.959              | 0.889      | 0.779      | 0.879      |
| Comb2                                                                                | 0.187        | 0.523              | 0.986              | 0.958      | 0.775      | 0.89       |
| Comb6                                                                                | 0.213        | 0.557              | 0.925              | 0.817      | 0.777      | 0.859      |
| Comb8                                                                                | 0.196        | 0.523              | 0.973              | 0.92       | 0.773      | 0.898      |
| Comb9                                                                                | 0.191        | 0.602              | 0.932              | 0.841      | 0.797      | 0.867      |

**Table S9.** Classification results for training and independent testing using reproducible & non-redundant features in the following category I) C1:Size & Shape features, II) C2:Location, RunL, CoOcc & Histogram features III) C3:Texture features.

I) Size & Shape Features:

| <b>a.TRAINING (4 Feature) : Primary: Cancer Vs Norm ( 78 Vs 166)    C1: Size &amp; Shape Features</b> |       |             |             |       |       |                    |               |
|-------------------------------------------------------------------------------------------------------|-------|-------------|-------------|-------|-------|--------------------|---------------|
| Features                                                                                              | Error | Sensitivity | Specificity | PPV   | NPV   | AUC                |               |
|                                                                                                       |       |             |             |       |       | $\mu$ ( $\sigma$ ) | CI            |
| F2:ShortAx-LongDia;F3:ShortAx;F25:Density;F32:RectangularFit                                          | 0.216 | 0.465       | 0.938       | 0.788 | 0.786 | 0.79<br>(0.069)    | [0.651,0.902] |
| F2:ShortAx-LongDia;F3:ShortAx;F39:Length-by-Thick;F32:RectangularFit                                  | 0.224 | 0.465       | 0.931       | 0.775 | 0.778 | 0.791<br>(0.057)   | [0.658,0.916] |
| F2:ShortAx-LongDia;F3:ShortAx;F37:Thickness-Pxl;F32:RectangularFit                                    | 0.221 | 0.457       | 0.934       | 0.774 | 0.783 | 0.797<br>(0.07)    | [0.655,0.919] |
| F2:ShortAx-LongDia;F3:ShortAx;F41:Border-Leng-Pxl;F32:RectangularFit                                  | 0.227 | 0.454       | 0.934       | 0.779 | 0.773 | 0.801<br>(0.061)   | [0.677,0.92]  |
| F2:ShortAx-LongDia;F3:ShortAx;F38:Length-Pxl;F32:RectangularFit                                       | 0.233 | 0.443       | 0.931       | 0.765 | 0.769 | 0.8(0.061)         | [0.662,0.91]  |

| <b>b. Cline (4Feature): Primary (Canc Vs Norm)    Test (88 Vs 147)  </b> |       |             |             |      |       |                  |               |
|--------------------------------------------------------------------------|-------|-------------|-------------|------|-------|------------------|---------------|
| Cline                                                                    | Error | Sensitivity | Specificity | PPV  | NPV   | AUC              | CI            |
| Age, Gender, Pky, Smoke-Status                                           | 0.321 | 0.002       | 0.994       | 0.01 | 0.681 | 0.533<br>(0.073) | [0.372,0.672] |

| <b>c. ImageF+Clinc (4Feature): Primary (Canc Vs Norm)    Test (88 Vs 147)   C1: Size &amp; Shape Features</b> |       |             |             |       |       |              |               |
|---------------------------------------------------------------------------------------------------------------|-------|-------------|-------------|-------|-------|--------------|---------------|
| F1                                                                                                            | Error | Sensitivity | Specificity | PPV   | NPV   | AUC          | CI            |
| Comb1                                                                                                         | 0.221 | 0.478       | 0.915       | 0.722 | 0.797 | 0.789(0.075) | [0.595,0.91]  |
| Comb2                                                                                                         | 0.232 | 0.434       | 0.919       | 0.713 | 0.783 | 0.774(0.077) | [0.587,0.935] |
| Comb3                                                                                                         | 0.236 | 0.454       | 0.918       | 0.738 | 0.774 | 0.783(0.054) | [0.678,0.89]  |
| Comb4                                                                                                         | 0.233 | 0.466       | 0.917       | 0.736 | 0.779 | 0.792(0.07)  | [0.604,0.904] |
| Comb6                                                                                                         | 0.223 | 0.452       | 0.924       | 0.736 | 0.789 | 0.783(0.066) | [0.651,0.92]  |

| <b>d. TESTING (4Feature): Primary (Canc Vs Norm)    Test (88 Vs 147)    C1: Size &amp; Shape Features</b> |       |             |             |       |       |       |
|-----------------------------------------------------------------------------------------------------------|-------|-------------|-------------|-------|-------|-------|
| Features                                                                                                  | Error | Sensitivity | Specificity | PPV   | NPV   | AUC   |
| F2:ShortAx-LongDia;F3:ShortAx;F25:Density;F32:RectangularFit                                              | 0.179 | 0.557       | 0.98        | 0.942 | 0.787 | 0.858 |
| F2:ShortAx-LongDia;F3:ShortAx;F39:Length-by-Thick;F32:RectangularFit                                      | 0.179 | 0.557       | 0.98        | 0.942 | 0.787 | 0.859 |
| F2:ShortAx-LongDia;F3:ShortAx;F37:Thickness-Pxl;F32:RectangularFit                                        | 0.179 | 0.557       | 0.98        | 0.942 | 0.787 | 0.863 |
| F2:ShortAx-LongDia;F3:ShortAx;F41:Border-Leng-Pxl;F32:RectangularFit                                      | 0.179 | 0.557       | 0.98        | 0.942 | 0.787 | 0.86  |
| F2:ShortAx-LongDia;F3:ShortAx;F38:Length-Pxl;F32:RectangularFit                                           | 0.179 | 0.557       | 0.98        | 0.942 | 0.787 | 0.86  |

| <b>e. TESTING (4F: Img+Clinc): Primary (Canc Vs Norm)    Test (88 Vs 147)   C1: Size &amp; Shape</b> |       |             |             |       |       |       |
|------------------------------------------------------------------------------------------------------|-------|-------------|-------------|-------|-------|-------|
| F1                                                                                                   | Error | Sensitivity | Specificity | PPV   | NPV   | AUC   |
| Comb1                                                                                                | 0.191 | 0.534       | 0.973       | 0.922 | 0.777 | 0.85  |
| Comb2                                                                                                | 0.2   | 0.523       | 0.966       | 0.902 | 0.772 | 0.85  |
| Comb3                                                                                                | 0.187 | 0.545       | 0.973       | 0.923 | 0.781 | 0.856 |
| Comb4                                                                                                | 0.196 | 0.534       | 0.966       | 0.904 | 0.776 | 0.851 |
| Comb6                                                                                                | 0.196 | 0.534       | 0.966       | 0.904 | 0.776 | 0.852 |

**II. Location, RunL, CoOcc & Histogram:**

| <b>TRAINING (4 Feature) : Primary: Cancer Vs Norm ( 78 Vs 166)    C2: Loc, CoOc&amp; RunL Features (Sort: AUC, Sen/Spec)</b> |       |             |             |       |       |                    |               |
|------------------------------------------------------------------------------------------------------------------------------|-------|-------------|-------------|-------|-------|--------------------|---------------|
| Features                                                                                                                     | Error | Sensitivity | Specificity | PPV   | NPV   | AUC                |               |
|                                                                                                                              |       |             |             |       |       | $\mu$ ( $\sigma$ ) | CI            |
| F27:Main-Direction;F185:Hist-SD-L1;F186:Hist-Energy-L1;F187:Hist-Entropy-L1                                                  | 0.224 | 0.609       | 0.86        | 0.686 | 0.818 | 0.788(0.08)        | [0.587,0.929] |
| F185:Hist-SD-L1;F186:Hist-Energy-L1;F187:Hist-Entropy-L1;F44:AvgCooc-Contrast                                                | 0.23  | 0.611       | 0.851       | 0.669 | 0.817 | 0.792(0.069)       | [0.649,0.941] |
| F9:8b-3D-Bord-to-Lung;F19:10a-3D-Relat-Vol-Airspaces;F21:10c-3D-Av-Vol-AirSpaces;F42:AvgCoOc-Homo                            | 0.215 | 0.544       | 0.908       | 0.746 | 0.802 | 0.851(0.053)       | [0.733,0.949] |
| F9:8b-3D-Bord-to-Lung;F21:10c-3D-Av-Vol-AirSpaces;F42:AvgCoOc-Homo;F52:AvgLRHGE                                              | 0.198 | 0.507       | 0.941       | 0.807 | 0.802 | 0.809(0.06)        | [0.692,0.911] |
| F9:8b-3D-Bord-to-Lung;F19:10a-3D-Relat-Vol-Airspaces;F21:10c-3D-Av-Vol-AirSpaces;F43:AvgCooc-Mp                              | 0.216 | 0.539       | 0.904       | 0.736 | 0.803 | 0.831(0.061)       | [0.688,0.931] |

| <b>Clinic (4Feature): Primary a (Canc Vs Norm)    Test (88 Vs 147)  </b> |       |             |             |       |       |               |               |
|--------------------------------------------------------------------------|-------|-------------|-------------|-------|-------|---------------|---------------|
| Clinic                                                                   | Error | Sensitivity | Specificity | PPV   | NPV   | AUC           | CI            |
| Age, Gender, Pky, Smoke-Status                                           | 0.328 | 0.008       | 0.99        | 0.052 | 0.676 | 0.511 (0.089) | [0.308,0.651] |

| <b>ImageF+ClinC (4Feature): Primary (Canc Vs Norm)    Test (88_Vs 147)   C2: Loc, CoOc&amp; RunL Features</b> |       |             |             |       |       |              |               |
|---------------------------------------------------------------------------------------------------------------|-------|-------------|-------------|-------|-------|--------------|---------------|
| F1                                                                                                            | Error | Sensitivity | Specificity | PPV   | NPV   | AUC          | CI            |
| Comb1                                                                                                         | 0.252 | 0.544       | 0.848       | 0.63  | 0.796 | 0.768(0.068) | [0.644,0.926] |
| Comb2                                                                                                         | 0.25  | 0.531       | 0.859       | 0.642 | 0.794 | 0.774(0.061) | [0.638,0.92]  |
| Comb4                                                                                                         | 0.218 | 0.533       | 0.909       | 0.745 | 0.799 | 0.844(0.061) | [0.708,0.944] |
| Comb7                                                                                                         | 0.227 | 0.477       | 0.915       | 0.733 | 0.785 | 0.801(0.067) | [0.659,0.908] |
| Comb9                                                                                                         | 0.222 | 0.513       | 0.908       | 0.74  | 0.795 | 0.819(0.062) | [0.699,0.924] |

| <b>TESTING (4Feature): Primary (Canc Vs Norm)    Test (88_Vs 147)    C2: Loc, CoOc&amp; RunL Features (Sort: AUC, Sen/Spec)</b> |       |             |             |       |       |       |
|---------------------------------------------------------------------------------------------------------------------------------|-------|-------------|-------------|-------|-------|-------|
| Features                                                                                                                        | Error | Sensitivity | Specificity | PPV   | NPV   | AUC   |
| F27:Main-Direction;F185:Hist-SD-L1;F186:Hist-Energy-L1;F187:Hist-Entropy-L1                                                     | 0.191 | 0.625       | 0.918       | 0.821 | 0.804 | 0.856 |
| F185:Hist-SD-L1;F186:Hist-Energy-L1;F187:Hist-Entropy-L1;F44:AvgCooC-Constrast                                                  | 0.174 | 0.67        | 0.918       | 0.831 | 0.823 | 0.858 |
| F9:8b-3D-Bord-to-Lung;F19:10a-3D-Relat-Vol-Airspaces;F21:10c-3D-Av-Vol-AirSpaces;F42:AvgCoOc-Homo                               | 0.166 | 0.693       | 0.918       | 0.836 | 0.833 | 0.878 |
| F9:8b-3D-Bord-to-Lung;F21:10c-3D-Av-Vol-AirSpaces;F42:AvgCoOc-Homo;F52:AvgLRHGE                                                 | 0.209 | 0.545       | 0.939       | 0.842 | 0.775 | 0.861 |
| F9:8b-3D-Bord-to-Lung;F19:10a-3D-Relat-Vol-Airspaces;F21:10c-3D-Av-Vol-AirSpaces;F43:AvgCooc-Mp                                 | 0.209 | 0.625       | 0.891       | 0.775 | 0.799 | 0.856 |

| <b>TESTING (4F: Img+ClinC): Primary (Canc Vs Norm)    Test (88_Vs 147)   C2: Loc, CoOc&amp; RunL</b> |       |             |             |       |       |       |
|------------------------------------------------------------------------------------------------------|-------|-------------|-------------|-------|-------|-------|
| F1                                                                                                   | Error | Sensitivity | Specificity | PPV   | NPV   | AUC   |
| Comb1                                                                                                | 0.209 | 0.568       | 0.925       | 0.82  | 0.782 | 0.853 |
| Comb2                                                                                                | 0.204 | 0.591       | 0.918       | 0.813 | 0.789 | 0.854 |
| Comb4                                                                                                | 0.191 | 0.614       | 0.925       | 0.831 | 0.8   | 0.877 |
| Comb7                                                                                                | 0.2   | 0.545       | 0.952       | 0.873 | 0.778 | 0.856 |
| Comb9                                                                                                | 0.221 | 0.591       | 0.891       | 0.765 | 0.784 | 0.856 |

III. Texture Features

| <b>a. TRAINING (4 Features) : Primary: Cancer Vs Norm ( 78 Vs 166)    C3: Texture Features</b> |       |             |             |       |       |                    |               |
|------------------------------------------------------------------------------------------------|-------|-------------|-------------|-------|-------|--------------------|---------------|
| Features                                                                                       | Error | Sensitivity | Specificity | PPV   | NPV   | AUC                |               |
|                                                                                                |       |             |             |       |       | $\mu$ ( $\sigma$ ) | CI            |
| F68:3D-Laws-10;F197:3D-WaveP2-L2-8;F214:3D-WaveP1-L2-25;F216:3D-WaveP1-L2-27                   | 0.242 | 0.426       | 0.926       | 0.745 | 0.763 | 0.75(0.076)        | [0.601,0.897] |
| F68:3D-Laws-10;F192:3D-WaveP2-L2-3;F215:3D-WaveP1-L2-26;F216:3D-WaveP1-L2-27                   | 0.24  | 0.42        | 0.924       | 0.73  | 0.77  | 0.75(0.081)        | [0.563,0.916] |
| F68:3D-Laws-10;F201:3D-WaveP2-L2-12;F214:3D-WaveP1-L2-25;F216:3D-WaveP1-L2-27                  | 0.239 | 0.418       | 0.929       | 0.746 | 0.767 | 0.768(0.076)       | [0.603,0.932] |
| F72:3D-Laws-14;F200:3D-WaveP2-L2-11;F215:3D-WaveP1-L2-26;F216:3D-WaveP1-L2-27                  | 0.24  | 0.395       | 0.936       | 0.759 | 0.764 | 0.761(0.075)       | [0.63,0.915]  |
| F143:3D-Laws-94;F201:3D-WaveP2-L2-12;F214:3D-WaveP1-L2-25;F216:3D-WaveP1-L2-27                 | 0.241 | 0.413       | 0.926       | 0.73  | 0.767 | 0.774(0.07)        | [0.619,0.9]   |

| <b>a. Clinic (4Feature): Primary (Canc Vs Norm)    Test (88 Vs 147)  </b> |       |             |             |       |      |              |              |
|---------------------------------------------------------------------------|-------|-------------|-------------|-------|------|--------------|--------------|
| Clinic                                                                    | Error | Sensitivity | Specificity | PPV   | NPV  | AUC          | CI           |
| Age, Gender, Pky, Smoke-Status                                            | 0.333 | 0.004       | 0.995       | 0.024 | 0.67 | 0.52 (0.066) | [0.377,0.65] |

| <b>a. ImageF+Clinic (4Feature): Primary (Canc Vs Norm)    Test (88 Vs 147)   C3: Texture Features</b> |       |             |             |       |       |              |               |
|-------------------------------------------------------------------------------------------------------|-------|-------------|-------------|-------|-------|--------------|---------------|
| F1                                                                                                    | Error | Sensitivity | Specificity | PPV   | NPV   | AUC          | CI            |
| Comb1                                                                                                 | 0.242 | 0.426       | 0.914       | 0.694 | 0.775 | 0.757(0.068) | [0.601,0.883] |
| Comb2                                                                                                 | 0.252 | 0.409       | 0.919       | 0.721 | 0.757 | 0.758(0.071) | [0.604,0.868] |
| Comb4                                                                                                 | 0.249 | 0.392       | 0.923       | 0.708 | 0.763 | 0.763(0.069) | [0.62,0.914]  |
| Comb5                                                                                                 | 0.243 | 0.382       | 0.934       | 0.741 | 0.761 | 0.749(0.081) | [0.535,0.886] |
| Comb8                                                                                                 | 0.25  | 0.408       | 0.916       | 0.711 | 0.765 | 0.763(0.067) | [0.613,0.9]   |

**SUPPLEMENTALS:** *Quantitative Imaging Features Improves Discrimination of Malignancy in Pulmonary Nodules (Y. Balagurunathan et al.)*

| <b>a. TESTING (4Feature): Primary (Canc Vs Norm)    Test (88 Vs 147    C3: Texture Features (Sort: AUC, Sen/Spec)</b> |       |             |             |       |       |       |
|-----------------------------------------------------------------------------------------------------------------------|-------|-------------|-------------|-------|-------|-------|
| Features                                                                                                              | Error | Sensitivity | Specificity | PPV   | NPV   | AUC   |
| F68:3D-Laws-10;F197:3D-WaveP2-L2-8;F214:3D-WaveP1-L2-25;F216:3D-WaveP1-L2-27                                          | 0.243 | 0.477       | 0.925       | 0.792 | 0.747 | 0.824 |
| F68:3D-Laws-10;F192:3D-WaveP2-L2-3;F215:3D-WaveP1-L2-26;F216:3D-WaveP1-L2-27                                          | 0.255 | 0.443       | 0.925       | 0.78  | 0.735 | 0.803 |
| F68:3D-Laws-10;F201:3D-WaveP2-L2-12;F214:3D-WaveP1-L2-25;F216:3D-WaveP1-L2-27                                         | 0.255 | 0.443       | 0.925       | 0.78  | 0.735 | 0.82  |
| F72:3D-Laws-14;F200:3D-WaveP2-L2-11;F215:3D-WaveP1-L2-26;F216:3D-WaveP1-L2-27                                         | 0.268 | 0.398       | 0.932       | 0.778 | 0.721 | 0.792 |
| F143:3D-Laws-94;F201:3D-WaveP2-L2-12;F214:3D-WaveP1-L2-25;F216:3D-WaveP1-L2-27                                        | 0.243 | 0.5         | 0.912       | 0.772 | 0.753 | 0.819 |

| <b>e. TESTING (4F: Img+Clinc): Primary (Canc Vs Norm)    T12 Test (88 Vs 147)   C3: Texture Features</b> |       |             |             |       |       |       |
|----------------------------------------------------------------------------------------------------------|-------|-------------|-------------|-------|-------|-------|
| F1                                                                                                       | Error | Sensitivity | Specificity | PPV   | NPV   | AUC   |
| Comb1                                                                                                    | 0.243 | 0.455       | 0.939       | 0.816 | 0.742 | 0.804 |
| Comb2                                                                                                    | 0.277 | 0.398       | 0.918       | 0.745 | 0.718 | 0.791 |
| Comb4                                                                                                    | 0.285 | 0.375       | 0.918       | 0.733 | 0.711 | 0.806 |
| Comb5                                                                                                    | 0.285 | 0.352       | 0.932       | 0.756 | 0.706 | 0.78  |
| Comb8                                                                                                    | 0.268 | 0.42        | 0.918       | 0.755 | 0.726 | 0.807 |

**Supplemental Table S10.** Top images features discriminating cancer to benign nodules using 129 reproducible, non-redundant features. Features across all categories

**Size Range:R1(4-12mm) & All Feature Categories: Youden metric (Sen/Spec, AUC)**

| <b>TRAINING (4 Feature) : Primary: Cancer Vs Norm ( 78 Vs 166)    All - R1 (4-12mm)</b> |       |             |             |       |       |                    |               |
|-----------------------------------------------------------------------------------------|-------|-------------|-------------|-------|-------|--------------------|---------------|
| Features                                                                                | Error | Sensitivity | Specificity | PPV   | NPV   | AUC                |               |
|                                                                                         |       |             |             |       |       | $\mu$ ( $\sigma$ ) | CI            |
| F17:9f-3D-Min-Dist-COG-to-Border;F26:EllipticFit;F34:Volume-pxl;F189:Hist-Skew-L1       | 0.155 | 0.335       | 0.974       | 0.737 | 0.857 | 0.683<br>(0.116)   | [0.409,0.909] |
| F3:ShortAx;F26:EllipticFit;F34:Volume-pxl;F189:Hist-Skew-L1                             | 0.153 | 0.33        | 0.975       | 0.745 | 0.857 | 0.663<br>(0.115)   | [0.406,0.903] |
| F4:Mn-Hu;F26:EllipticFit;F34:Volume-pxl;F172:3D-Laws-123                                | 0.16  | 0.313       | 0.966       | 0.691 | 0.858 | 0.754<br>(0.131)   | [0.389,0.962] |
| F4:Mn-Hu;F26:EllipticFit;F34:Volume-pxl;F138:3D-Laws-89                                 | 0.149 | 0.294       | 0.983       | 0.753 | 0.856 | 0.748<br>(0.11)    | [0.468,0.948] |
| F5:Std-Hu;F26:EllipticFit;F34:Volume-pxl;F189:Hist-Skew-L1                              | 0.159 | 0.305       | 0.967       | 0.689 | 0.858 | 0.67<br>(0.099)    | [0.452,0.882] |

| <b>Clinc (4Feature): Primary (Canc Vs Norm)    Test (88 Vs 147)  </b> |       |             |             |     |       |                  |               |
|-----------------------------------------------------------------------|-------|-------------|-------------|-----|-------|------------------|---------------|
| Clinc                                                                 | Error | Sensitivity | Specificity | PPV | NPV   | AUC              | CI            |
| Age, Gender, Pky, Smoke-Status                                        | 0.191 | 0           | 0.999       | 0   | 0.809 | 0.615<br>(0.103) | [0.382,0.836] |

| <b>TRAIN: ImageF+Clinc (4Feature): Primary (Canc Vs Norm)    Test (88 Vs 147)   R1: All</b> |       |             |             |       |       |              |               |
|---------------------------------------------------------------------------------------------|-------|-------------|-------------|-------|-------|--------------|---------------|
| F1                                                                                          | Error | Sensitivity | Specificity | PPV   | NPV   | AUC          | CI            |
| Comb2                                                                                       | 0.186 | 0.1         | 0.97        | 0.343 | 0.832 | 0.692(0.11)  | [0.46,0.917]  |
| Comb3                                                                                       | 0.201 | 0.054       | 0.965       | 0.162 | 0.822 | 0.67(0.107)  | [0.413,0.907] |
| Comb7                                                                                       | 0.169 | 0.206       | 0.967       | 0.532 | 0.85  | 0.74(0.111)  | [0.459,0.972] |
| Comb8                                                                                       | 0.182 | 0.141       | 0.971       | 0.46  | 0.834 | 0.73(0.106)  | [0.477,0.96]  |
| Comb9                                                                                       | 0.205 | 0.073       | 0.96        | 0.243 | 0.821 | 0.684(0.111) | [0.401,0.876] |



**SUPPLEMENTALS:** *Quantitative Imaging Features Improves Discrimination of Malignancy in Pulmonary Nodules (Y. Balagurunathan et al.)*

| <b>TESTING (4Feature): Primary (Canc Vs Norm)    Test (88 Vs 147)   All – R1</b> |              |                    |                    |            |            |            |
|----------------------------------------------------------------------------------|--------------|--------------------|--------------------|------------|------------|------------|
| <b>F1</b>                                                                        | <b>Error</b> | <b>Sensitivity</b> | <b>Specificity</b> | <b>PPV</b> | <b>NPV</b> | <b>AUC</b> |
| Comb2                                                                            | 0.173        | 0.161              | 0.985              | 0.714      | 0.832      | 0.771      |
| Comb3                                                                            | 0.167        | 0.161              | 0.992              | 0.833      | 0.833      | 0.786      |
| Comb7                                                                            | 0.179        | 0.194              | 0.969              | 0.6        | 0.836      | 0.795      |
| Comb8                                                                            | 0.191        | 0.161              | 0.962              | 0.5        | 0.829      | 0.778      |
| Comb9                                                                            | 0.167        | 0.161              | 0.992              | 0.833      | 0.833      | 0.814      |

| <b>TESTING (4F: Img+Cline): Primary (Canc Vs Norm)    Test (88 Vs 147)   R1- All</b> |              |                    |                    |            |            |            |
|--------------------------------------------------------------------------------------|--------------|--------------------|--------------------|------------|------------|------------|
| <b>F1</b>                                                                            | <b>Error</b> | <b>Sensitivity</b> | <b>Specificity</b> | <b>PPV</b> | <b>NPV</b> | <b>AUC</b> |
| Comb2                                                                                | 0.179        | 0.129              | 0.985              | 0.667      | 0.827      | 0.732      |
| Comb3                                                                                | 0.167        | 0.129              | 1                  | 1          | 0.829      | 0.745      |
| Comb7                                                                                | 0.173        | 0.194              | 0.977              | 0.667      | 0.837      | 0.767      |
| Comb8                                                                                | 0.191        | 0.161              | 0.962              | 0.5        | 0.829      | 0.754      |
| Comb9                                                                                | 0.173        | 0.129              | 0.992              | 0.8        | 0.828      | 0.765      |

**Size Range: R2: (>12 -30mm)**

| <b>TRAINING (4 Feature) : Primary at T12: Cancer Vs Norm ( 78 Vs 166)    All - R2 (&gt;12 -30mm)</b> |       |             |             |       |       |                    |               |
|------------------------------------------------------------------------------------------------------|-------|-------------|-------------|-------|-------|--------------------|---------------|
| Features                                                                                             | Error | Sensitivity | Specificity | PPV   | NPV   | AUC                |               |
|                                                                                                      |       |             |             |       |       | $\mu$ ( $\sigma$ ) | CI            |
| F44:AvgCooC-Constrast;F196:3D-WaveP2-L2-7;F199:3D-WaveP2-L2-10;F214:3D-WaveP1-L2-25                  | 0.211 | 0.913       | 0.569       | 0.815 | 0.732 | 0.702<br>(0.192)   | [0.24,0.96]   |
| F17:9f-3D-Min-Dist-COG-to-Border;F44:AvgCooC-Constrast;F204:3D-WaveP2-L2-15;F214:3D-WaveP1-L2-25     | 0.207 | 0.925       | 0.518       | 0.818 | 0.719 | 0.707<br>(0.152)   | [0.37,0.965]  |
| F44:AvgCooC-Constrast;F55:AvgRP;F204:3D-WaveP2-L2-15;F214:3D-WaveP1-L2-25                            | 0.217 | 0.914       | 0.505       | 0.816 | 0.678 | 0.692<br>(0.143)   | [0.4,0.933]   |
| F21:10c-3D-Av-Vol-AirSpaces;F38:Length-Pxl;F64:3D-Laws-6;F204:3D-WaveP2-L2-15                        | 0.224 | 0.906       | 0.499       | 0.81  | 0.68  | 0.684<br>(0.185)   | [0.208,0.958] |
| F43:AvgCooc-Mp;F55:AvgRP;F204:3D-WaveP2-L2-15;F214:3D-WaveP1-L2-25                                   | 0.226 | 0.925       | 0.477       | 0.802 | 0.689 | 0.7<br>(0.181)     | [0.288,0.963] |

| <b>Clinc (4Feature): Primary at T12 (Canc Vs Norm)    Prim at T12 Test (88 Vs 147)   R2 (&gt;12-30mm) All</b> |       |             |             |       |     |             |               |
|---------------------------------------------------------------------------------------------------------------|-------|-------------|-------------|-------|-----|-------------|---------------|
| Clinc                                                                                                         | Error | Sensitivity | Specificity | PPV   | NPV | AUC         | CI            |
| Age, Gender, Pky, Smoke-Status                                                                                | 0.388 | 0.92        | 0           | 0.651 | 0   | 0.36(0.162) | [0.068,0.645] |

| <b>TRAIN: ImageF+Clinc (4Feature): Primary at T12 (Canc Vs Norm)    Prim at T12 Test (88 Vs 147)   R2 (&gt;12-30mm): All</b> |       |             |             |       |       |              |               |
|------------------------------------------------------------------------------------------------------------------------------|-------|-------------|-------------|-------|-------|--------------|---------------|
| F1                                                                                                                           | Error | Sensitivity | Specificity | PPV   | NPV   | AUC          | CI            |
| Comb1                                                                                                                        | 0.32  | 0.858       | 0.319       | 0.732 | 0.504 | 0.69(0.206)  | [0.2,0.95]    |
| Comb2                                                                                                                        | 0.419 | 0.795       | 0.19        | 0.662 | 0.279 | 0.545(0.15)  | [0.24,0.863]  |
| Comb5                                                                                                                        | 0.402 | 0.787       | 0.217       | 0.688 | 0.292 | 0.571(0.171) | [0.167,0.88]  |
| Comb6                                                                                                                        | 0.37  | 0.824       | 0.289       | 0.701 | 0.39  | 0.574(0.173) | [0.208,0.958] |
| Comb10                                                                                                                       | 0.392 | 0.8         | 0.268       | 0.686 | 0.336 | 0.576(0.164) | [0.288,0.921] |

**TESTING (4Feature): Primary at T12 (Canc Vs Norm) || Prim at T12 Test (88 Vs 147)|| All – R2**

| F1     | Error | Sensitivity | Specificity | PPV   | NPV   | AUC   |
|--------|-------|-------------|-------------|-------|-------|-------|
| Comb1  | 0.315 | 0.739       | 0.375       | 0.872 | 0.2   | 0.601 |
| Comb2  | 0.259 | 0.848       | 0.125       | 0.848 | 0.125 | 0.579 |
| Comb5  | 0.259 | 0.848       | 0.125       | 0.848 | 0.125 | 0.606 |
| Comb6  | 0.167 | 0.957       | 0.125       | 0.863 | 0.333 | 0.628 |
| Comb10 | 0.222 | 0.87        | 0.25        | 0.87  | 0.25  | 0.614 |

**TESTING (4F: Img+Clin): Primary at T12 (Canc Vs Norm) || Prim at T12 Test (88 Vs 147)|| R2 (>12-30mm)- All**

| F1     | Error | Sensitivity | Specificity | PPV   | NPV   | AUC   |
|--------|-------|-------------|-------------|-------|-------|-------|
| Comb1  | 0.296 | 0.761       | 0.375       | 0.875 | 0.214 | 0.649 |
| Comb2  | 0.259 | 0.848       | 0.125       | 0.848 | 0.125 | 0.571 |
| Comb5  | 0.241 | 0.87        | 0.125       | 0.851 | 0.143 | 0.59  |
| Comb6  | 0.167 | 0.935       | 0.25        | 0.878 | 0.4   | 0.723 |
| Comb10 | 0.185 | 0.891       | 0.375       | 0.891 | 0.375 | 0.644 |

**Supplemental Table S11.** Top images features discriminating cancer to benign nodules in Indeterminate size range (R1: 4 to 12mm) using 129 reproducible, non-redundant features in three categories (Size & Shape, CooCc & Run. Length, Texture).

**A) Range R1 (4 to 12mm) and C1: Size & Shape: Youden metric (Sen/Spec, AUC)**

| <b>TRAINING (4 Feature) : Primary at T12: Cancer Vs Norm ( 78 Vs 166)    C1 &amp; R1 ( 4 -12mm)</b> |       |             |             |       |       |                    |               |
|-----------------------------------------------------------------------------------------------------|-------|-------------|-------------|-------|-------|--------------------|---------------|
| Features                                                                                            | error | sensitivity | Specificity | PPV   | NPV   | AUC                |               |
|                                                                                                     |       |             |             |       |       | $\mu$ ( $\sigma$ ) | CI            |
| F1:LongDia;F6:Vol-cm;F37:Thickness-Pxl;F14:9c-3D-Compact                                            | .18   | .115        | 0.989       | 0.517 | 0.824 | 0.556<br>(0.12)    | [0.302,0.806] |
| F6:Vol-cm;F38:Length-Pxl;F40:Length-by-Width;F41:Border-Leng-Pxl                                    | .168  | .109        | 0.992       | 0.495 | 0.835 | 0.615<br>(0.107)   | [0.415,0.811] |
| F6:Vol-cm;F38:Length-Pxl;F41:Border-Leng-Pxl;F30:Shape-Index                                        | .178  | .104        | 0.994       | 0.546 | 0.824 | 0.586(0.121)       | [0.313,0.844] |
| F6:Vol-cm;F34:Volume-pxl;F38:Length-Pxl;F30:Shape-Index                                             | .189  | .114        | 0.982       | 0.471 | 0.82  | 0.619(0.111)       | [0.333,0.822] |
| F36:Width-Pxl;F38:Length-Pxl;F40:Length-by-Width;F41:Border-Leng-Pxl                                | .173  | .106        | 0.989       | 0.46  | 0.832 | 0.626(0.139)       | [0.296,0.914] |

| <b>Clinc (4Feature): Primary at T12 (Canc Vs Norm)    Prim at T12 Test (88 Vs 147)   C1 &amp; R1 ( 4 -12mm)</b> |       |             |             |    |      |                 |               |
|-----------------------------------------------------------------------------------------------------------------|-------|-------------|-------------|----|------|-----------------|---------------|
| Clinc                                                                                                           | Error | Sensitivity | Specificity | PV | PV   | AUC             | CI            |
| Age, Gender, Pky, Smoke-Status                                                                                  | 0.191 | 0           | 0.999       | 0  | 0.81 | 0.57<br>(0.115) | [0.299,0.811] |

| <b>TRAIN: ImageF+Clinc (4Feature): Primary at T12 (Canc Vs Norm)    Prim at T12 Test (88 Vs 147)   C1 &amp; R1 ( 4 -12mm)</b> |       |             |             |      |      |              |               |
|-------------------------------------------------------------------------------------------------------------------------------|-------|-------------|-------------|------|------|--------------|---------------|
| F1                                                                                                                            | Error | Sensitivity | Specificity | PV   | PV   | AUC          | CI            |
| Comb1                                                                                                                         | 0.175 | 0.125       | 0.985       | .517 | .832 | 0.642(0.13)  | [0.347,0.87]  |
| Comb2                                                                                                                         | 0.168 | 0.098       | 0.99        | .393 | .836 | 0.609(0.108) | [0.385,0.82]  |
| Comb3                                                                                                                         | 0.172 | 0.11        | 0.994       | .535 | .828 | 0.622(0.106) | [0.367,0.833] |
| Comb4                                                                                                                         | .177  | 0           | 0.984       | .508 | .83  | 0.629(0.112) | [0.349,0.806] |
| Comb5                                                                                                                         | 0.171 | 0.122       | 0.989       | .513 | .833 | 0.647(0.125) | [0.374,0.89]  |

**SUPPLEMENTALS: Quantitative Imaging Features Improves Discrimination of Malignancy in Pulmonary Nodules (Y. Balagurunathan et al.)**

| <b>TESTING (4Feature): Primary at T12 (Canc Vs Norm)    Prim at T12 Test (88 Vs 147)   C1 &amp; R1 (4-12mm)</b> |       |             |             |       |       |       |
|-----------------------------------------------------------------------------------------------------------------|-------|-------------|-------------|-------|-------|-------|
| F1                                                                                                              | Error | Sensitivity | Specificity | PPV   | NPV   | AUC   |
| Comb1                                                                                                           | 0.154 | 0.258       | 0.985       | 0.8   | 0.849 | 0.679 |
| Comb2                                                                                                           | 0.173 | 0.161       | 0.985       | 0.714 | 0.832 | 0.71  |
| Comb3                                                                                                           | 0.173 | 0.194       | 0.977       | 0.667 | 0.837 | 0.697 |
| Comb4                                                                                                           | 0.179 | 0.194       | 0.969       | 0.6   | 0.836 | 0.692 |
| Comb5                                                                                                           | 0.198 | 0.032       | 0.985       | 0.333 | 0.811 | 0.671 |

| <b>TESTING (4F: Img+Clinc): Primary at T12 (Canc Vs Norm)    Prim at T12 Test (88 Vs 147)   C1 &amp; R1 (4-12mm)</b> |       |             |             |       |       |       |
|----------------------------------------------------------------------------------------------------------------------|-------|-------------|-------------|-------|-------|-------|
| F1                                                                                                                   | Error | Sensitivity | Specificity | PPV   | NPV   | AUC   |
| Comb1                                                                                                                | 0.167 | 0.226       | 0.977       | 0.7   | 0.842 | 0.659 |
| Comb2                                                                                                                | 0.167 | 0.161       | 0.992       | 0.833 | 0.833 | 0.667 |
| Comb3                                                                                                                | 0.173 | 0.194       | 0.977       | 0.667 | 0.837 | 0.661 |
| Comb4                                                                                                                | 0.167 | 0.194       | 0.985       | 0.75  | 0.838 | 0.659 |
| Comb5                                                                                                                | 0.191 | 0.065       | 0.985       | 0.5   | 0.816 | 0.615 |

**B) Range R1 (4 to 12mm): C2: Location, CoOc & RunL: Youden metric (Sen/Spec, AUC)**

| <b>TRAINING (4 Feature) : Primary at T12: Cancer Vs Norm ( 78 Vs 166)    C2: CoOc &amp; RunL Features (Range: R1: 4-12mm).</b> |       |             |             |       |       |                    |               |
|--------------------------------------------------------------------------------------------------------------------------------|-------|-------------|-------------|-------|-------|--------------------|---------------|
| Features                                                                                                                       | Error | Sensitivity | Specificity | PPV   | NPV   | AUC                |               |
|                                                                                                                                |       |             |             |       |       | $\mu$ ( $\sigma$ ) | CI            |
| F9:8b-3D-Bord-to-Lung;F17:9f-3D-Min-Dist-COG-to-Border;F19:10a-3D-Relat-Vol-Airspaces;F55:AvgRP                                | 0.176 | 0.256       | 0.969       | 0.656 | 0.838 | 0.825<br>(0.087)   | [0.633,0.972] |
| F9:8b-3D-Bord-to-Lung;F19:10a-3D-Relat-Vol-Airspaces;F5:Std-Hu;F48:AvgGLN                                                      | 0.183 | 0.248       | 0.955       | 0.528 | 0.844 | 0.806<br>(0.091)   | [0.598,0.965] |
| F9:8b-3D-Bord-to-Lung;F19:10a-3D-Relat-Vol-Airspaces;F5:Std-Hu;F55:AvgRP                                                       | 0.183 | 0.252       | 0.949       | 0.507 | 0.847 | 0.801<br>(0.103)   | [0.57,0.944]  |
| F9:8b-3D-Bord-to-Lung;F19:10a-3D-Relat-Vol-Airspaces;F20:10b-3D-Num-AirSpaces;F55:AvgRP                                        | 0.189 | 0.246       | 0.951       | 0.499 | 0.839 | 0.768<br>(0.114)   | [0.522,0.948] |
| F9:8b-3D-Bord-to-Lung;F17:9f-3D-Min-Dist-COG-to-Border;F48:AvgGLN;F52:AvgLRHGE                                                 | 0.173 | 0.225       | 0.972       | 0.608 | 0.841 | 0.774<br>(0.103)   | [0.461,0.932] |

| <b>Clinc (4Feature): Primary at T12 (Canc Vs Norm)    Prim at T12 Test (88 Vs 147)   C2: RunG-CoOc -1 (4-12mm)</b> |       |             |             |     |       |                  |               |
|--------------------------------------------------------------------------------------------------------------------|-------|-------------|-------------|-----|-------|------------------|---------------|
| Clinc                                                                                                              | Error | Sensitivity | Specificity | PPV | NPV   | AUC              | CI            |
| Age, Gender, Pky, Smoke-Status                                                                                     | 0.189 | 0           | 0.999       | 0   | 0.812 | 0.593<br>(0.127) | [0.342,0.878] |

**SUPPLEMENTALS:** *Quantitative Imaging Features Improves Discrimination of Malignancy in Pulmonary Nodules (Y. Balagurunathan et al.)*

**TRAIN: ImageF+Cline (4Feature): Primary at T12 (Canc Vs Norm) || Prim at T12 Test (88 Vs 147) || C2: RunG-CoOc – R1 (4-12mm)**

| F1    | Error | Sensitivity | Specificity | PPV   | NPV   | AUC          | CI            |
|-------|-------|-------------|-------------|-------|-------|--------------|---------------|
| Comb1 | 0.171 | 0.278       | 0.964       | 0.609 | 0.847 | 0.808(0.083) | [0.608,0.968] |
| Comb2 | 0.179 | 0.278       | 0.954       | 0.567 | 0.846 | 0.803(0.097) | [0.554,0.952] |
| Comb3 | 0.173 | 0.315       | 0.951       | 0.588 | 0.853 | 0.813(0.086) | [0.643,0.964] |
| Comb4 | 0.176 | 0.261       | 0.957       | 0.565 | 0.848 | 0.773(0.106) | [0.554,0.967] |
| Comb5 | 0.161 | 0.262       | 0.969       | 0.606 | 0.855 | 0.789(0.09)  | [0.578,0.954] |

**TESTING (4Feature: lmgF): Primary at T12 (Canc Vs Norm) || Prim at T12 Test (88 Vs 147) || C2: RunG-CoOc Features, Range: R1 (4-12mm)**

| Features | Error | Sensitivity | Specificity | PPV   | NPV   | AUC   |
|----------|-------|-------------|-------------|-------|-------|-------|
| Comb1    | 0.167 | 0.226       |             | 0.977 | 0.7   | 0.842 |
| Comb2    | 0.136 | 0.419       |             | 0.969 | 0.765 | 0.876 |
| Comb3    | 0.148 | 0.387       |             | 0.962 | 0.706 | 0.869 |
| Comb4    | 0.179 | 0.258       |             | 0.954 | 0.571 | 0.845 |
| Comb5    | 0.179 | 0.194       |             | 0.969 | 0.6   | 0.836 |

**TESTING (4Feature: lmgF+Cline): Primary at T12 (Canc Vs Norm) || Prim at T12 Test (88 Vs 147) || C2: RunG-CoOc, Range: R1 (4 - 12mm) .**

| Features | Error | Sensitivity | Specificity | PPV   | NPV   | AUC   |
|----------|-------|-------------|-------------|-------|-------|-------|
| Comb1    | 0.185 | 0.129       | 0.977       | 0.571 | 0.826 | 0.766 |
| Comb2    | 0.148 | 0.323       | 0.977       | 0.769 | 0.859 | 0.823 |
| Comb3    | 0.154 | 0.29        | 0.977       | 0.75  | 0.853 | 0.829 |
| Comb4    | 0.179 | 0.226       | 0.962       | 0.583 | 0.84  | 0.803 |
| Comb5    | 0.167 | 0.194       | 0.985       | 0.75  | 0.838 | 0.707 |

**Background Information for Supplemental Figure SF1.**

We also attempted to find stable features across non-growing controls over three screening scans that were acquired about a year apart. We observed large variations in features due to patient level scan differences across time. In this sub-study, 26 features were stable at a CCC  $\geq 0.6$ ; and these were included as part of the test-retest repeatable feature set (See *Supplemental Figure SF1*).

**Supplemental Figure SF1.** Differential variability plots (Bland-Altman plots) between non-cancerous across time points (NC1 & 2 are Non-cancer cohort 1 & 2). A) Longest diameter for first cohort (top panel). B) Longest diameter for second cohort (bottom panel) C) Size distribution (longest diameter & volume) across time points.

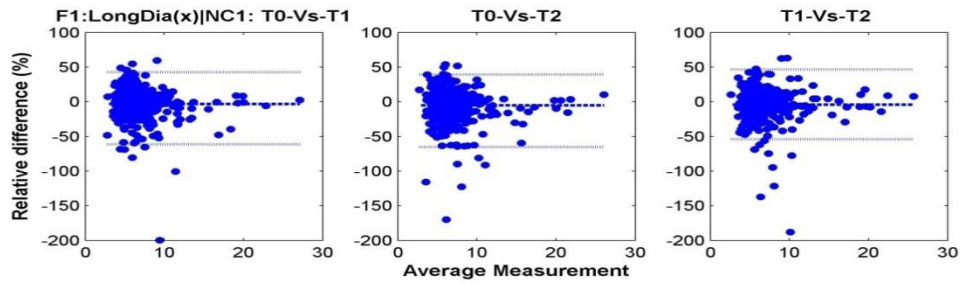

(a)

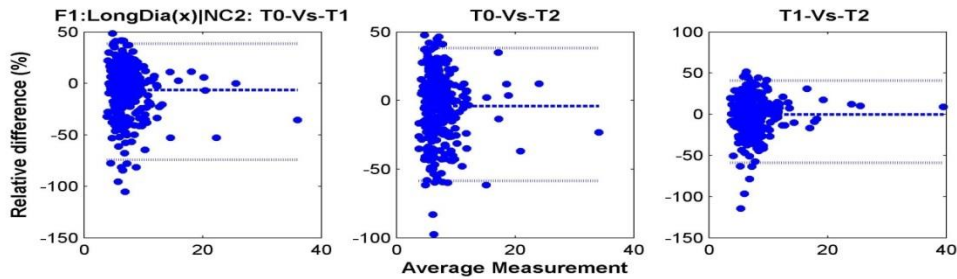

(b)

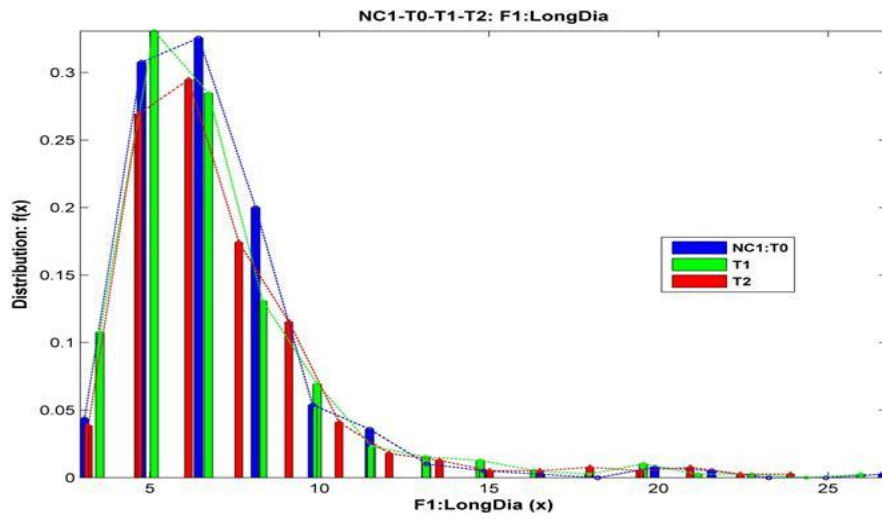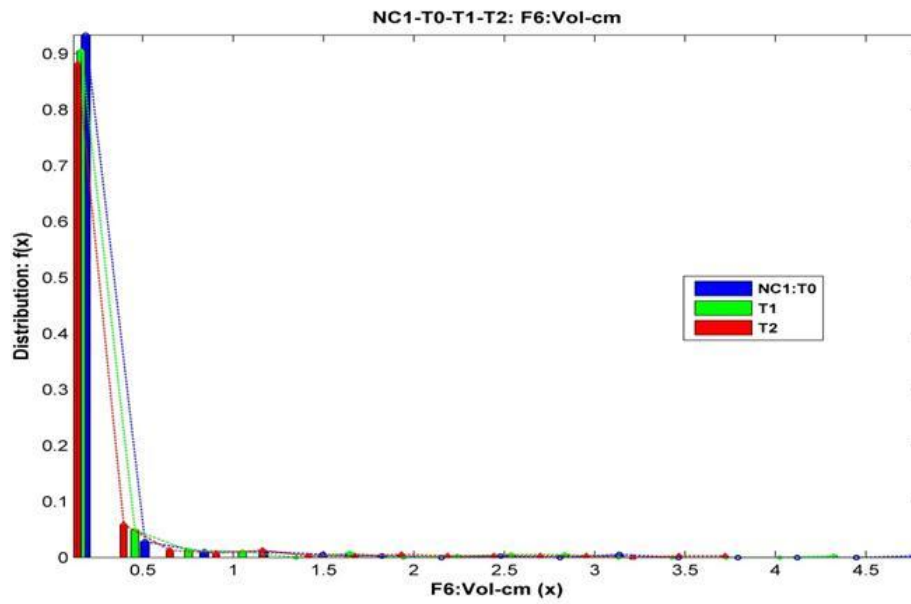

(c)



| <b>Concordance Correlation Coefficient: Normal Cases (Nodule+, non-Cancer)</b> |                   |          |                                     |           |          |           |       |
|--------------------------------------------------------------------------------|-------------------|----------|-------------------------------------|-----------|----------|-----------|-------|
| <b>(T0 Vs T1, T0 Vs T2, T1 Vs T2) : Min</b>                                    |                   |          |                                     |           |          |           |       |
| Category                                                                       | Feature Type      | Subtotal | Percent of features (Num. Features) |           |          |           |       |
|                                                                                |                   |          | ≤ 60%                               | ≥ 70%     | ≥ 80%    | ≥ 85%     | ≥ 90% |
| C1.Size & Shape                                                                | Size              | 13       | 84.6 (11)                           | 76.9 (10) | 46.2(6)  | 0 (0)     | 0 (0) |
|                                                                                | Shape             | 12       | 25 (3)                              | 16.7(2)   | 0 (0)    | 0 (0)     | 0 (0) |
| C2. Location, RunL & CoOc, Histogram                                           | Location          | 14       | 42.9 (6)                            | 35.7(5)   | 35.7 (5) | 14.3      | 0 (0) |
|                                                                                | Histogram         | 8        | 37.5 (3)                            | 12.5(1)   | 0 (0)    | 0 (0)     | 0 (0) |
|                                                                                | Runlength & CoOcc | 17       | 17.6 (3)                            | 17.7(3)   | 11.7 (2) | 0 (0)     | 0 (0) |
| C3. Texture: Laws&Wavelet                                                      | Laws              | 125      | 0.8 (1)                             | 0.8 (1)   | 0 (0)    | 0 (0)     | 0 (0) |
|                                                                                | Wavelet           | 30       | 0 (0)                               | 0 (0)     | 0 (0)    | 0 (0)     | 0 (0) |
| Total                                                                          |                   | 219      | 12.3 (27)                           | 10.1 (22) | 5.9 (13) | 0.913 (2) | 0 (0) |

**Supplemental Figure SF2.** The figure shows the workflow to assess classifier performance due to reconstruction kernels. The classifier was formed using a data set with one type of kernel (in a manufacturer) to discriminate malignant lung nodules and tested on a data set with different kernel type used by the same manufacturer, keeping other parameters constant. The variability in the predictions (AUC) was evaluated and reported as percent change. The figures contrast visual difference in image reconstructions of two different convolution kernels (across columns), where each row represents a patient nodule. The panel shows A) workflow for the reconstruction study B) Patient scans reconstructed using Siemens scanner (B30F, B50F, slice thickness 2mm) C) Patient scans reconstructed using General Electric (GE) scanner (Standard & Bone, slice thickness 2.5mm). Details of the analysis will be reported in our following study (11).

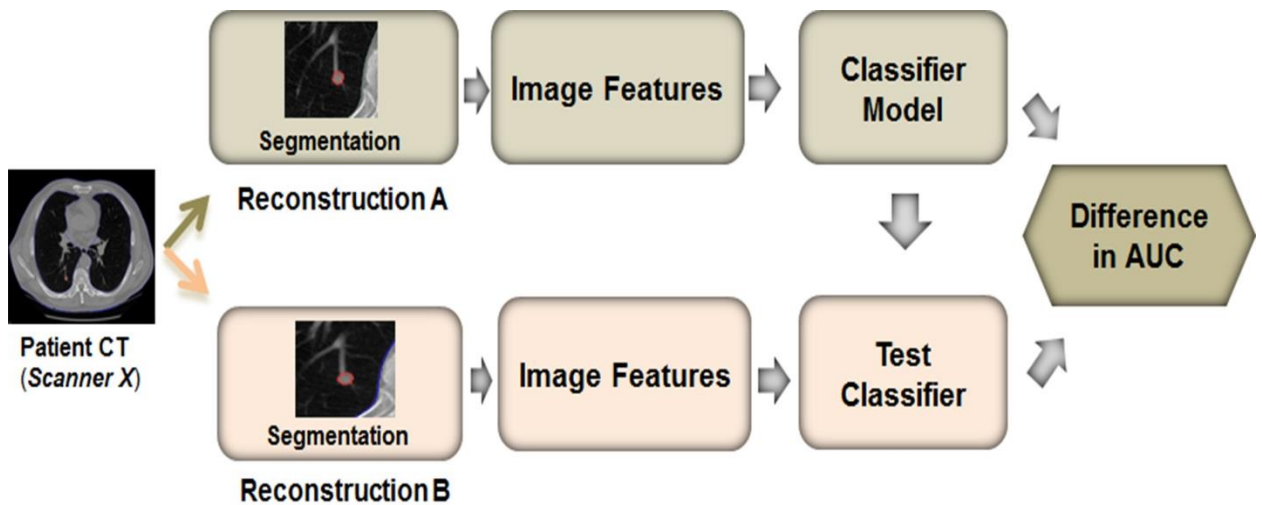

(A)

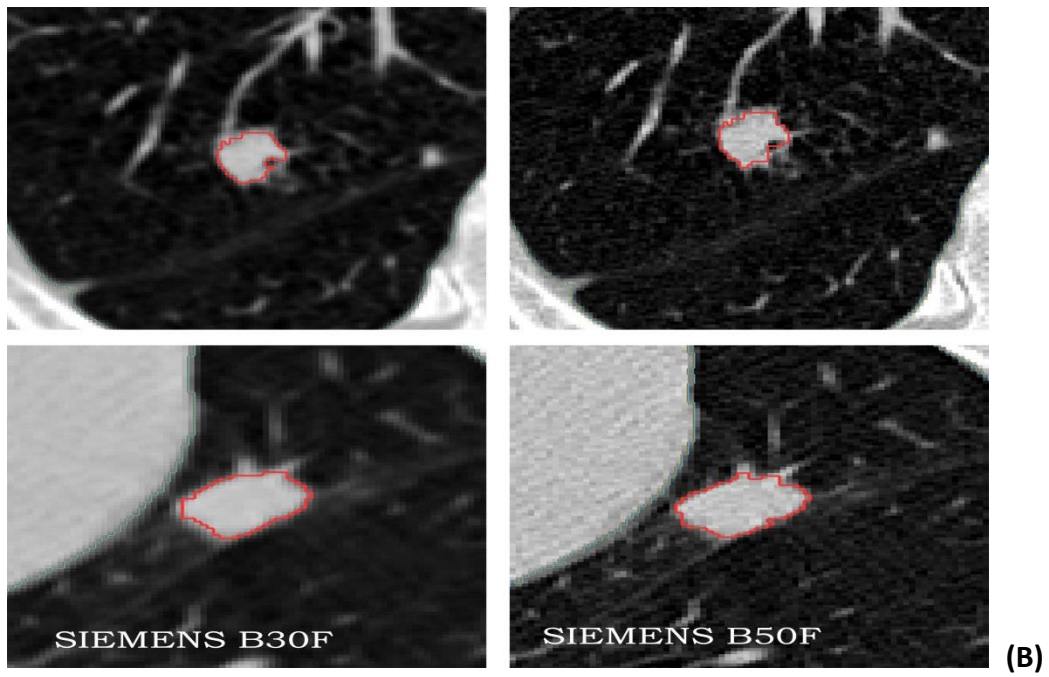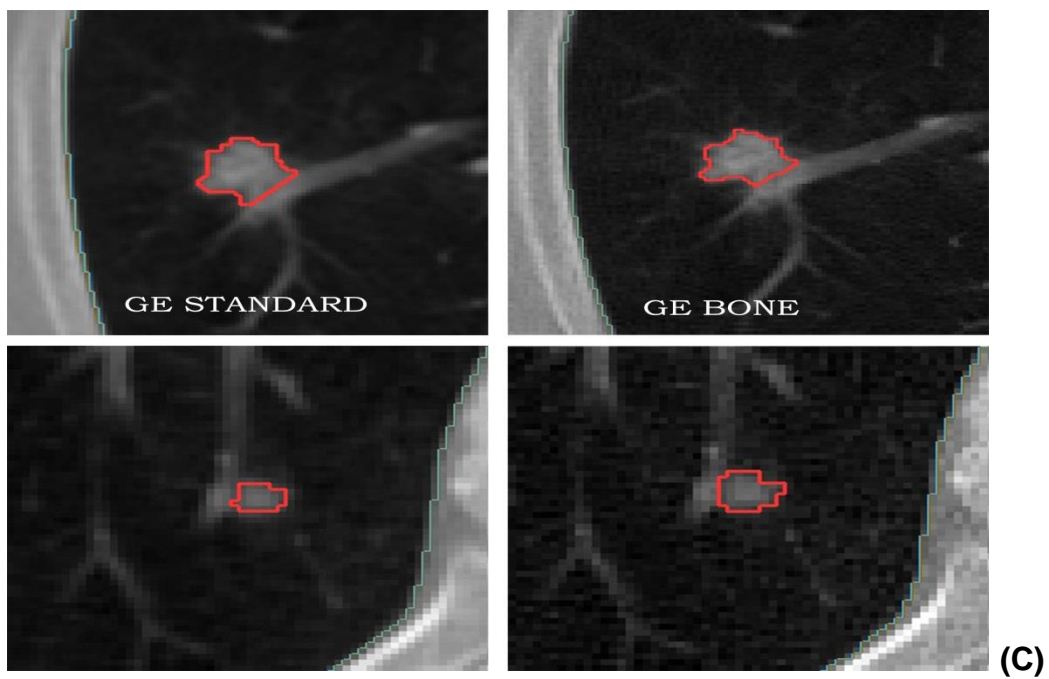

**Supplemental Figure SF3.** Size distribution of lung nodules used in the training and validation (test) cohorts A) Longest diameter (mm), B) Volume (cm).

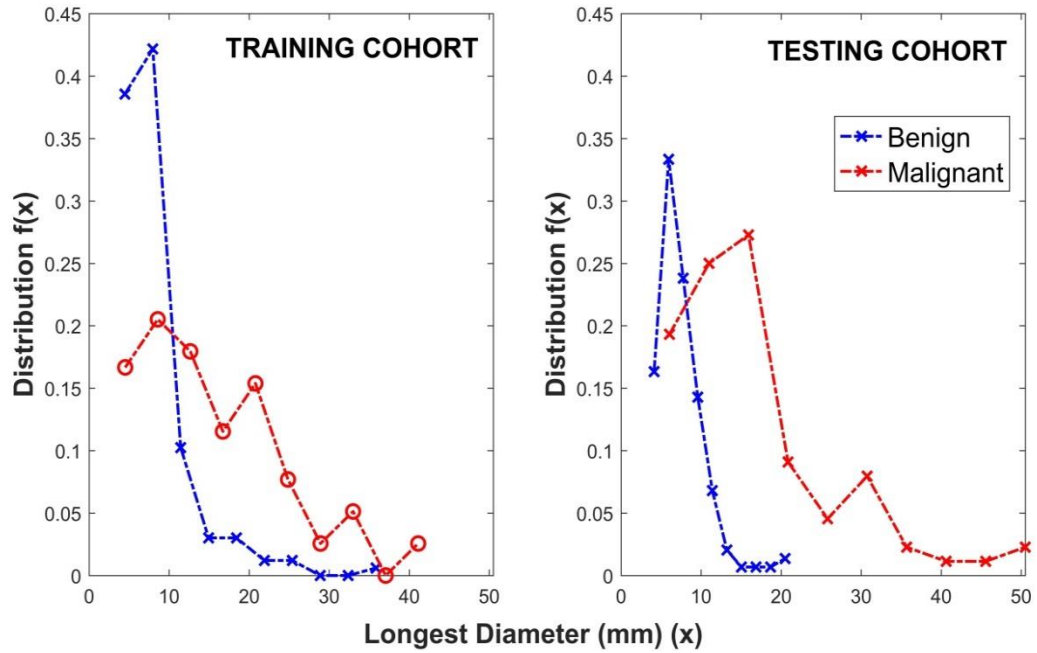

(A)

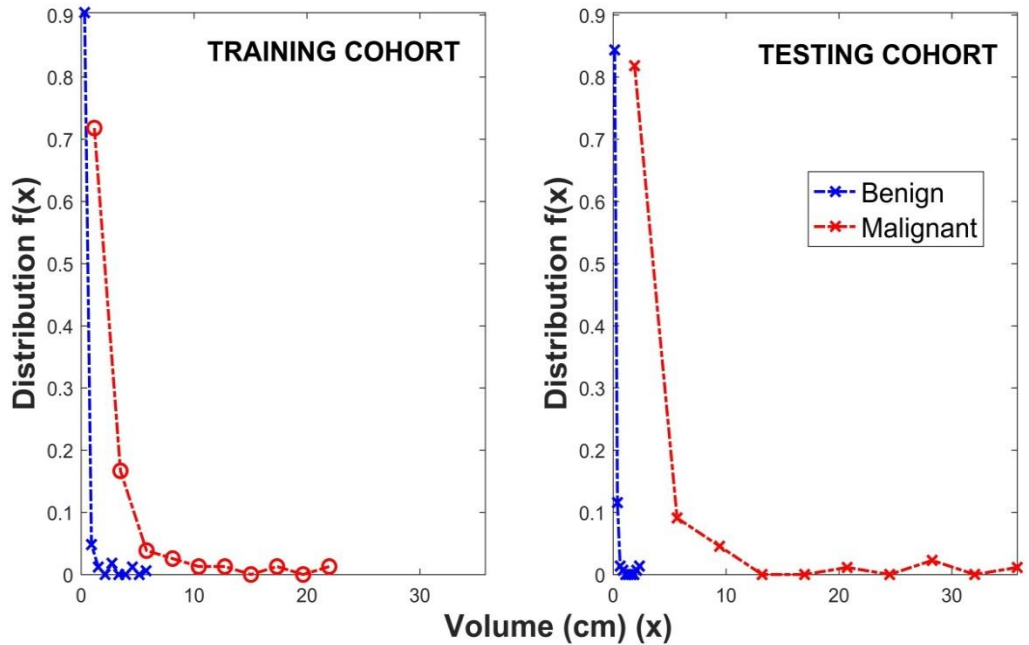

(B)

## Reference

1. Schonmeyer R, Athellogou M, Sittek H, Ellenberg P, Feehan O, Schmidt G, Binnig G. Cognition Network Technology prototype of a CAD system for mammography to assist radiologists by finding similar cases in a reference database. *International journal of computer assisted radiology and surgery*. 2011;6(1):127-34. Epub 2010/05/27. doi: 10.1007/s11548-010-0486-8. PubMed PMID: 20503075.
2. Balagurunathan Y GY, Wang H, Kumar V, Grove O, Hawkins S, Kim J, Goldgof DB, Hall LO, Gatenby RA, Gillies RJ. Reproducibility and Prognosis of Quantitative features extracted from CT images *Transl Oncol*. 2014;7(1):72-87.
3. Xu D-H, Kuran AS, Furst JD, DS. R. RUN-LENGTH ENCODING FOR VOLUMETRIC TEXTURE. 4th IASTED Int'l Conf on Visualization, Imaging and Image Processing; September 6-8; Marbella, Spain.2004.
4. Tang X. Texture information in run-length matrices. *IEEE Transactions on Image Processing*. 1998;7(11):1602-9.
5. A.S. Kurani D-HX, J.D. Furst, and D.S. Raicu. Co-occurrence matrices for volumetric data. 7th IASTED Int'l Conf on Computer Graphics and Imaging2004.
6. Mokji M.M ABSAR. Gray Level Co-Occurrence Matrix Computation Based On Haar Wavelet. *IEEE Computer Graphics, Imaging and Visualisation (CGIV '07): IEEE Aug 2007*. p. 273-9.
7. V.A. Kovalev FK, H.-J Gertz, and D.Y. von Cramon. Three-dimensional texture analysis of MRI brain datasets. *IEEE Trans on Medical Imaging*. 2001;20(5):424-33.
8. Laws K. *Texture Image Segmentation*. Los Angeles: University of South California 1980.
9. Benke K K CDaSDR. A study of the effect of image quality on texture energy measures. *Meas Sci Technol*. 1994;5:400-7.
10. K. Jafari-Khouzani HS-Z, K. Elisevich, and S. Patel. Comparison of 2D and 3D wavelet features for the lateralization. In *Proc of SPIE Medical Imaging 2004: Physiology, Function and Structure from Medical Images*. 2004;5369:593-601.
11. Balagurunathan Y, Moros E, Garcia A, Schabath M, Gillies RJ. Effects of CT scanner variability on pulmonary nodule discrimination. (in preparation). 2017.
